# Supplementary material
Source: Royal Society of Chemistry journal article supplement (doi:10.1039/d6tc00899b)
Supplement: d6tc00899b1.pdf [file d6tc00899b1.pdf]

Electronic Supplementary Information

for

**Near Infrared Electroluminescence in Light-emitting Electrochemical Cells from Binuclear Copper(I) Complexes bearing  $\pi$ -extended Benzimidazole and Benzothiazole Ligands**

Audrey Fluck,<sup>a,†</sup> Valerio Giuso,<sup>b,†</sup> Chun-Hsi Liu,<sup>c,†</sup> Christophe Gourlaouen,<sup>d</sup> Cristina Cebrián,<sup>e</sup> Federico Polo,<sup>f,g</sup> Hai-Ching Su,<sup>c,\*</sup> Abdelaziz Jouaiti,<sup>a,\*</sup> and Matteo Mauro,<sup>b,e,\*</sup>

<sup>a</sup> *Laboratoire de Synthèse et Fonctions des Architectures Moléculaires, UMR7140 Chimie de la Matière Complexe, Université de Strasbourg & CNRS, 4 rue Blaise Pascal 67000 Strasbourg (France). E-mail: [jouaiti@unistra.fr](mailto:jouaiti@unistra.fr)*

<sup>b</sup> *Université de Strasbourg & CNRS, Institut de Physique et Chimie des Matériaux de Strasbourg UMR 7504, F-67034 Strasbourg, France*

<sup>c</sup> *Institute of Lighting and Energy Photonics, National Yang Ming Chiao Tung University, Tainan 71150, Taiwan. E-mail: [haichingsu@nycu.edu.tw](mailto:haichingsu@nycu.edu.tw)*

<sup>d</sup> *Laboratoire de Modélisation et Simulations Moléculaires, UMR 7140 Chimie de la Matière Complexe, Institut Le Bel, F-67081 Strasbourg, France*

<sup>e</sup> *Department of Chemical Sciences, University of Padova, Via Marzolo 1, 35121 Padova, Italy. E-mail: [matteo.mauro@unipd.it](mailto:matteo.mauro@unipd.it)*

<sup>f</sup> *Department of Molecular Sciences and Nanosystems, Ca' Foscari University of Venice, Via Torino 155, 30172 Venezia (Italy)*

<sup>g</sup> *European Centre for Living Technology (ECLT), Ca' Bottacin, 30124, Venice, Italy*

<sup>†</sup> These authors equally contributed to the work.

## Experimental section

### General synthetic considerations

$^1\text{H}$ ,  $^{13}\text{C}\{^1\text{H}\}$  and  $^{31}\text{P}\{^1\text{H}\}$  NMR spectra were recorded at 298 K on either a Bruker AV300 or AV500 spectrometer in deuterated solvents and the residual solvent peak was used as the internal reference. All the chemical shifts ( $\delta$ ) are reported in ppm. High-resolution electrospray mass spectrometry (HR-ESI-MS) was performed by the Service Spectrométrie de Masse of the Fédération de Chimie “Le Bel” UAR2042 of the University of Strasbourg and spectra were recorded on a MicroToF Bruker equipped with an electrospray ionization source.

1*H*-Benzimidazole-2-carboxaldehyde,  $[\text{Cu}(\text{CH}_3\text{CN})_4]\text{PF}_6$ , dithiooxamide and oxy-di-2,1-phenylene)bis(diphenylphosphine) (DPEPhos) are commercially available and were used as received from Aldrich Chemicals, Acros or BLDPharm. Solvents and other commonly available reagents were purchased and used without further purification.

The synthesis of 1-phenyl-1*H*-benzo[*d*]imidazole-2-carbaldehyde **3**, was carried out in two steps following previously reported procedures<sup>1</sup> and the chemical analyses and reaction yields agrees well with the reported data.

### Synthetic procedures

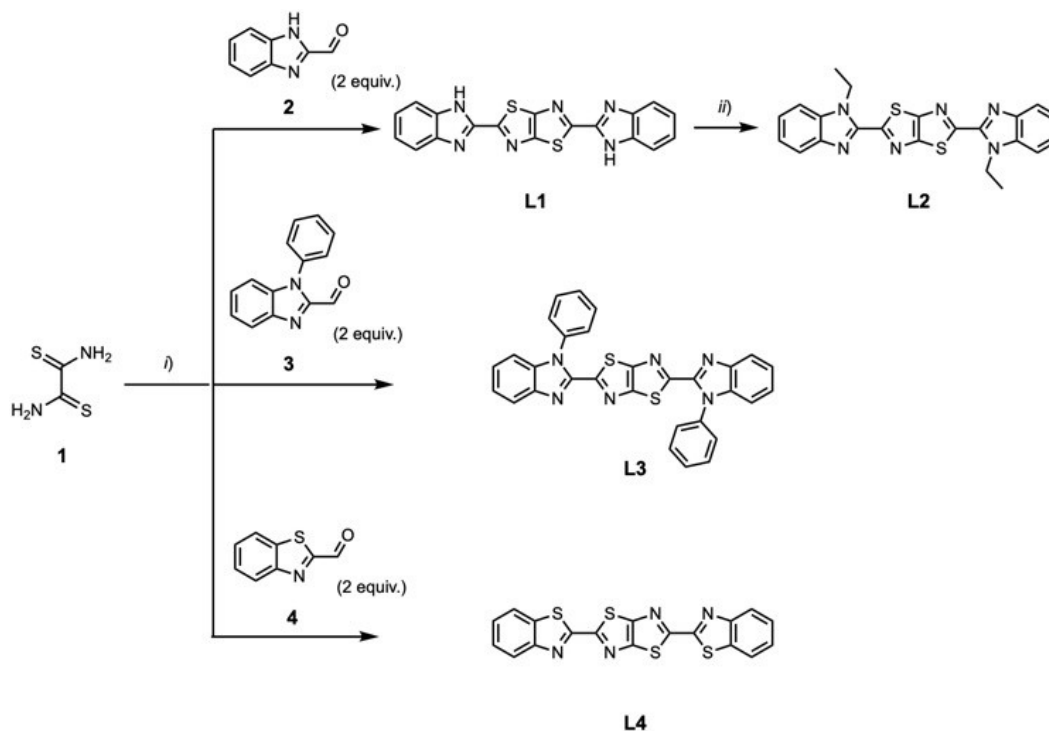

**Scheme S1.** Synthetic pathway employed for the synthesis of the ligands **L1-L4**. Conditions: *i*) DMF, reflux, 24 hours; *ii*) ethyl bromide,  $\text{K}_2\text{CO}_3$ , DMF, 90 °C, 16 hours.

*2,5-bis(1H-benzo[d]imidazol-2-yl)thiazolo[5,4-d]thiazole (L1).*

1H-benzo[d]imidazole-2-carbaldehyde (1.0 g, 6.84 mmol) was suspended in DMF (20 mL) and the mixture was degassed with Ar. Dithiooxamide (411 mg, 3.42 mmol) was added and the mixture was refluxed under Ar for 24 hours. After cooling down the mixture at room temperature, the formed precipitate was filtered off, washed with MeOH and dried to give the expected product as a light brown solid. (509 mg, yield 40%). The  $^{13}\text{C}\{^1\text{H}\}$  NMR of this compound could not be recorded due to its low solubility.  $^1\text{H}$  NMR (300 MHz, DMSO- $d_6$ )  $\delta$  (ppm): 13.73 (br s, 2H), 7.75 (br s, 2H), 7.60 (br s, 2H), 7.33 (br s, 4H). HR-MS (ESI):  $m/z$   $[\text{M} + \text{H}]^+$  calcd for  $\text{C}_{18}\text{H}_{11}\text{N}_6\text{S}_2$   $[\text{M} + \text{H}]^+$  375.0481, found 375.0496. Elemental analysis: Calculated for  $\text{C}_{18}\text{H}_{10}\text{N}_6\text{S}_2 \cdot 3 \text{H}_2\text{O}$ : C, 50.46; H, 3.76; N, 19.61. Found: C, 50.08; H, 2.43; N, 19.20

*2,5-bis(1-ethyl-1H-benzo[d]imidazol-2-yl)thiazolo[5,4-d]thiazole (L2).*

*2,5-bis(1H-benzo[d]imidazol-2-yl)thiazolo[5,4-d]thiazole* (200 mg, 0.53 mmol) was suspended in DMF (5 mL) and the mixture was degassed with Ar.  $\text{K}_2\text{CO}_3$  (360 mg, 2.62 mmol) and then iodoethane (125  $\mu\text{L}$ , 1.56 mmol) were added and the mixture that was heated at  $90^\circ\text{C}$  under Ar for 48 hours. After cooling down at room temperature, the formed precipitate was filtered off, washed with water then MeOH and dried to give the expected product as a yellow powder (179 mg, 78% yield). The  $^{13}\text{C}\{^1\text{H}\}$  NMR of this compound could not be recorded due to its low solubility.  $^1\text{H}$  NMR (500 MHz,  $\text{CDCl}_3$ )  $\delta$  (ppm): 7.87 (d,  $J = 7.7$  Hz, 2H), 7.50 (d,  $J = 8.0$  Hz, 2H), 7.44–7.33 (m, 4H), 4.96 (q,  $J = 7.1$  Hz, 4H), 1.58 (t,  $J = 7.3$  Hz, 6H). HR-MS (ESI):  $m/z$   $[\text{M} + \text{H}]^+$  calcd for  $\text{C}_{22}\text{H}_{19}\text{N}_6\text{S}_2$   $[\text{M} + \text{H}]^+$  431.1107, found 431.1086. Elemental analysis: Calculated for  $\text{C}_{22}\text{H}_{18}\text{N}_6\text{S}_2 \cdot \text{H}_2\text{O}$ : C, 58.91; H, 4.49; N, 18.74. Found: C, 58.51; H, 3.94; N, 18.39.

*2,5-bis(1-phenyl-1H-benzo[d]imidazol-2-yl)thiazolo[5,4-d]thiazole (L3).*

1-phenyl-1H-benzo[d]imidazole-2-carbaldehyde (377 mg, 1.7 mmol) was suspended in DMF (5 mL) and the mixture was degassed with Ar. Dithiooxamide (102 mg, 0.85 mmol) was added and the mixture was refluxed under Ar for 24 hours. After cooling down the mixture at room temperature, the formed precipitate was filtered off, washed with MeOH and dried to give the expected product as a yellow solid (216 mg, 48% yield).  $^1\text{H}$  NMR (500 MHz,  $\text{CDCl}_3$ )  $\delta$  (ppm): 7.90 (dt,  $J = 8.2, 0.9$  Hz, 2H), 7.60–7.58 (m, 6H), 7.47–7.42 (m, 4H), 7.38 (ddd,  $J = 8.1, 7.1, 1.2$  Hz, 2H), 7.32 (ddd,  $J = 8.2, 7.1, 1.2$  Hz, 2H), 7.17 (dt,  $J = 8.0, 1.0$  Hz, 2H).  $^{13}\text{C}\{^1\text{H}\}$  NMR (126 MHz,  $\text{CDCl}_3$ )  $\delta$  (ppm): 160.1, 152.8, 145.1, 142.8, 138.3, 136.2, 129.8, 129.5, 128.1, 125.2, 124.1, 120.6, 111.2. HR-MS (ESI):  $m/z$   $[\text{M} + \text{H}]^+$  calcd for  $\text{C}_{30}\text{H}_{19}\text{N}_6\text{S}_2$   $[\text{M} + \text{H}]^+$

527.1107, found 527.1087. Elemental analysis: Calculated for  $C_{30}H_{18}N_6S_2$ : C, 68.42; H, 3.45; N, 15.96. Found: C, 68.24; H, 3.42; N, 15.80. Single crystals suitable for RX diffraction analysis were obtained from  $CDCl_3$  (CCDC 2402732)

#### 2,5-bis(benzo[d]thiazol-2-yl)thiazolo[5,4-d]thiazole (**L4**).

Benzo[d]thiazole-2-carbaldehyde (1.0 g, 6.12 mmol) was suspended in DMF (20 mL) and the mixture was degassed with Ar. Dithiooxamide (0.367 g, 3.06 mmol) was added and the mixture was refluxed under Ar for 24 hours. After cooling down to room temperature, the formed precipitate was filtered off, washed with MeOH and dried to give the expected product as a light brown solid (0.700 g, yield 56%). Due to its low solubility the  $^1H$  NMR and  $^{13}C\{^1H\}$  NMR of this compound could not be performed, and the product was used as obtained for the following step. Elemental analysis: Calculated for  $C_{18}H_8N_4S_4$ : C, 52.92; H, 1.97; N, 13.71. Found: C, 52.94; H, 1.96; 13.58.

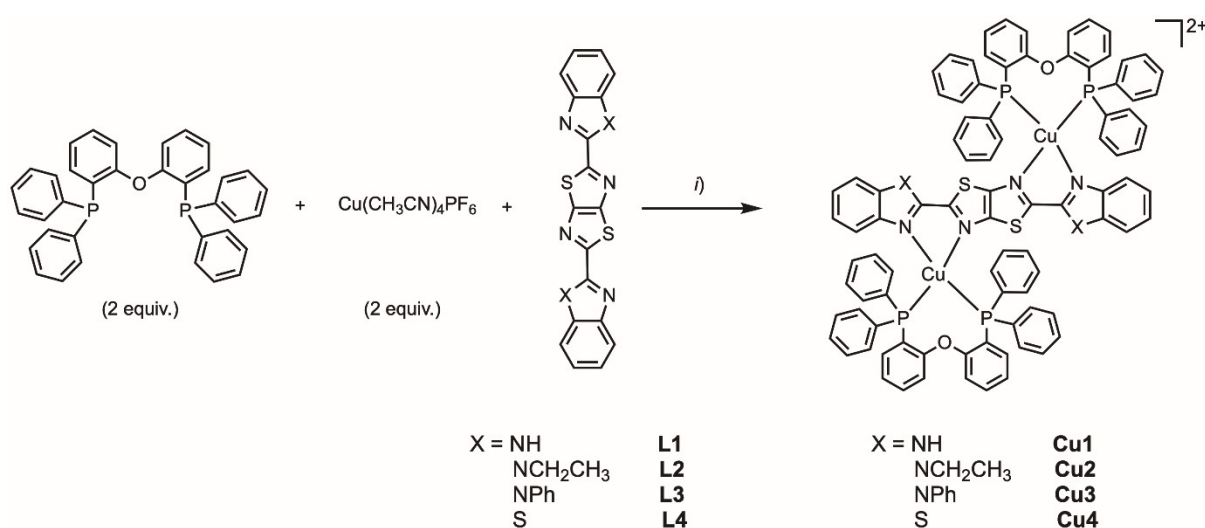

**Scheme S2.** Synthetic pathway employed for the synthesis of dinuclear compounds **Cu1**, **Cu2** and **Cu3** prepared as  $PF_6^-$  salt. Conditions: *i*)  $[Cu(CH_3CN)_4]PF_6$  (2 equiv.), DPEPhos (2 equiv.) and the corresponding ligand **L1–L4** (2 equiv.),  $CH_2Cl_2$ , room temperature

#### Synthesis of complex $[Cu_2(DPEPhos)_2(L1)](PF_6)_2$ (**Cu1**).

Under a stream of argon, DPEPhos (188 mg, 0.35 mmol) was dissolved in  $CH_2Cl_2$  (28 mL),  $[Cu(CH_3CN)_4]PF_6$  (129 mg, 0.35 mmol) was added and the mixture was stirred under Ar for 5 min. 2,5-bis(1*H*-benzo[*d*]imidazol-2-yl)thiazolo[5,4-*d*]thiazole (**L1**) (65 mg, 0.17 mmol) was added and the mixture was stirred under argon at room temperature for 5 days, until it turned into a clear reddish solution. The mixture was concentrated to almost dryness,  $Et_2O$  was added and the red-orange precipitate was washed three times with  $Et_2O$  and dried to give the expected product as a dark orange solid (287 mg, 90% yield).  $^1H$  NMR (300 MHz,  $CD_2Cl_2$ )  $\delta$  (ppm): 11.42 (s, 2H), 7.83 (d,  $J = 8.1$  Hz, 2H), 7.48–7.29 (m, 12H), 7.28–7.19 (m, 6H), 7.18–7.06 (m,

28H), 7.05–6.94 (m, 12H), 6.86–6.77 (m, 4H).  $^{31}\text{P}$  NMR (121.5 MHz,  $\text{CD}_2\text{Cl}_2$ )  $\delta$  (ppm): –12.50, –143.53 (hept,  $J = 713.7$  Hz). HR-MS (ESI):  $m/z$   $[\text{M} + \text{H}]^+$  calcd for  $\text{C}_{90}\text{H}_{65}\text{Cu}_2\text{N}_6\text{O}_2\text{P}_4\text{S}_2$   $[\text{M} + \text{H}]^+$  1575.2147, found 1575.2133. Crystals suitable for RX diffraction were obtained by vapour diffusion of  $\text{Et}_2\text{O}$  into an acetone solution of the complex (CCDC 2402730).

#### Synthesis of complex $[\text{Cu}_2(\text{DPEPhos})_2(\text{L2})](\text{PF}_6)_2$ (**Cu2**).

Under a stream of argon, DPEPhos (150 mg, 0.28 mmol) was dissolved in  $\text{CH}_2\text{Cl}_2$  (23 mL),  $[\text{Cu}(\text{CH}_3\text{CN})_4]\text{PF}_6$  (104 mg, 0.28 mmol) was added and the mixture was stirred under Ar for 5 min. 2,5-bis(1-ethyl-1*H*-benzo[*d*]imidazol-2-yl)thiazolo[5,4-*d*]thiazole (**L2**) (60 mg, 0.14 mmol) was added. The mixture turned red and it was stirred at room temperature under Ar for 4 hours. The mixture was concentrated to almost dryness,  $\text{Et}_2\text{O}$  was added and the orange precipitate was washed three times with  $\text{Et}_2\text{O}$  and dried to give the expected product as a bright orange solid (251 mg, 93% yield).  $^1\text{H}$  NMR (300 MHz,  $\text{CD}_2\text{Cl}_2$ )  $\delta$  (ppm): 7.67 (dd,  $J = 10.0$ , 8.4 Hz, 4H), 7.60–7.52 (m, 2H), 7.47–7.31 (m, 18H), 7.29–7.21 (m, 8H), 7.18–7.09 (m, 12H), 7.03–6.96 (m, 4H), 6.91 (t,  $J = 7.5$  Hz, 8H), 6.83–6.73 (m, 8H), 4.40 (q,  $J = 7.2$  Hz, 4H), 1.50 (t,  $J = 7.3$  Hz, 6H).  $^{31}\text{P}$  NMR (121.5 MHz,  $\text{CD}_2\text{Cl}_2$ )  $\delta$  (ppm) = –12.45, –143.79 (hept,  $J = 713.7$  Hz). HR-MS (ESI):  $m/z$   $[\text{M} + \text{H}]^+$  calcd for  $\text{C}_{94}\text{H}_{74}\text{Cu}_2\text{F}_6\text{N}_6\text{O}_2\text{P}_5\text{S}_2$   $[\text{M} + \text{H}]^+$  1777.2493, found 1777.2490. Crystals suitable for RX diffraction were obtained by vapour diffusion of  $\text{Et}_2\text{O}$  into an acetone solution of the complex (CCDC 2402731).

#### Synthesis of complex $[\text{Cu}_2(\text{DPEPhos})_2(\text{L3})](\text{PF}_6)_2$ (**Cu3**).

Under a stream of argon, DPEPhos (123 mg, 0.23 mmol) was dissolved in  $\text{CH}_2\text{Cl}_2$  (18 mL),  $[\text{Cu}(\text{CH}_3\text{CN})_4]\text{PF}_6$  (85 mg, 0.23 mmol) was added and the mixture was stirred under Ar for 5 min. 2,5-bis(1-phenyl-1*H*-benzo[*d*]imidazol-2-yl)thiazolo[5,4-*d*]thiazole (**L3**) (60 mg, 0.11 mmol) was added. The mixture turned red and it was stirred at room temperature under Ar for 4 hours. The mixture was concentrated to almost dryness,  $\text{Et}_2\text{O}$  was added and the orange precipitate was washed three times with  $\text{Et}_2\text{O}$  3 and dried to give the expected product as a bright orange solid (215 mg, 97% yield).  $^1\text{H}$  NMR (300 MHz,  $\text{CD}_2\text{Cl}_2$ )  $\delta$ : 7.99–7.81 (m, 6H), 7.58 (d,  $J = 7.9$  Hz, 2H), 7.47–7.18 (m, 36H), 7.16–7.06 (m, 6H), 7.03–6.90 (m, 12H), 6.88–6.72 (m, 12H).  $^{31}\text{P}$  NMR (121 MHz,  $\text{CD}_2\text{Cl}_2$ )  $\delta$ : –12.07, –144.49 (p,  $J = 708$  Hz). HR-MS (ESI):  $m/z$   $[\text{M} + \text{H}]^+$  calcd for  $\text{C}_{102}\text{H}_{74}\text{Cu}_2\text{F}_6\text{N}_6\text{O}_2\text{P}_5\text{S}_2$   $[\text{M} + \text{H}]^+$  1873.2493, found 1873.2437. Crystals suitable for RX diffraction were obtained by vapour diffusion of  $\text{Et}_2\text{O}$  into an acetone solution of the complex (CCDC 2402732).

### Synthesis of complex $[\text{Cu}_2(\text{DPEPhos})_2(\text{L4})](\text{PF}_6)_2$ (**Cu4**).

Under a stream of argon, DPEPhos (0.263 g, 0.48 mmol) was dissolved in  $\text{CH}_2\text{Cl}_2$  (20 mL),  $[\text{Cu}(\text{CH}_3\text{CN})_4]\text{PF}_6$  (0.181 g, 0.48 mmol) was added and the mixture was stirred under Ar for 5 min. 2,5-bis(benzo[*d*]thiazol-2-yl)thiazolo[5,4-*d*]thiazole (**L4**) (0.1 g, 0.24 mmol) was added and the mixture was stirred at room temperature under Ar for 3 days and until it turned into a clear reddish solution. The mixture was concentrated to almost dryness, then  $\text{Et}_2\text{O}$  was added and the red-orange precipitate was washed three times with  $\text{Et}_2\text{O}$  and dried to give the expected product as a red solid (0.380 mg, 98% yield).  $^1\text{H}$  NMR (500 MHz,  $\text{CD}_2\text{Cl}_2$ )  $\delta$  (ppm): 8.12 (d,  $J = 10$  Hz, 2H), 7.86 (d,  $J = 10$  Hz, 2H), 7.61 (t,  $J = 10$  Hz, 2H), 7.49 (t,  $J = 10$  Hz, 2H), 7.43 – 6.86 (br m, 56H).  $^{31}\text{P}\{^1\text{H}\}$  NMR (121.5 MHz,  $\text{CD}_2\text{Cl}_2$ )  $\delta$  (ppm): –12.54, –143.57 (hept,  $J = 713.7$  Hz). HR-MS (ESI):  $m/z$   $[\text{M} + \text{H}]^+$  calcd for  $\text{C}_{54}\text{H}_{36}\text{CuN}_4\text{OP}_2\text{S}_4$   $[\text{M} + \text{H}]^+$  1009.0538, found 1009.0529. Crystals suitable for RX diffraction were obtained by vapour diffusion of  $\text{Et}_2\text{O}$  into a  $\text{CHCl}_3$  solution of the complex (CCDC 2412038).

### NMR Spectra

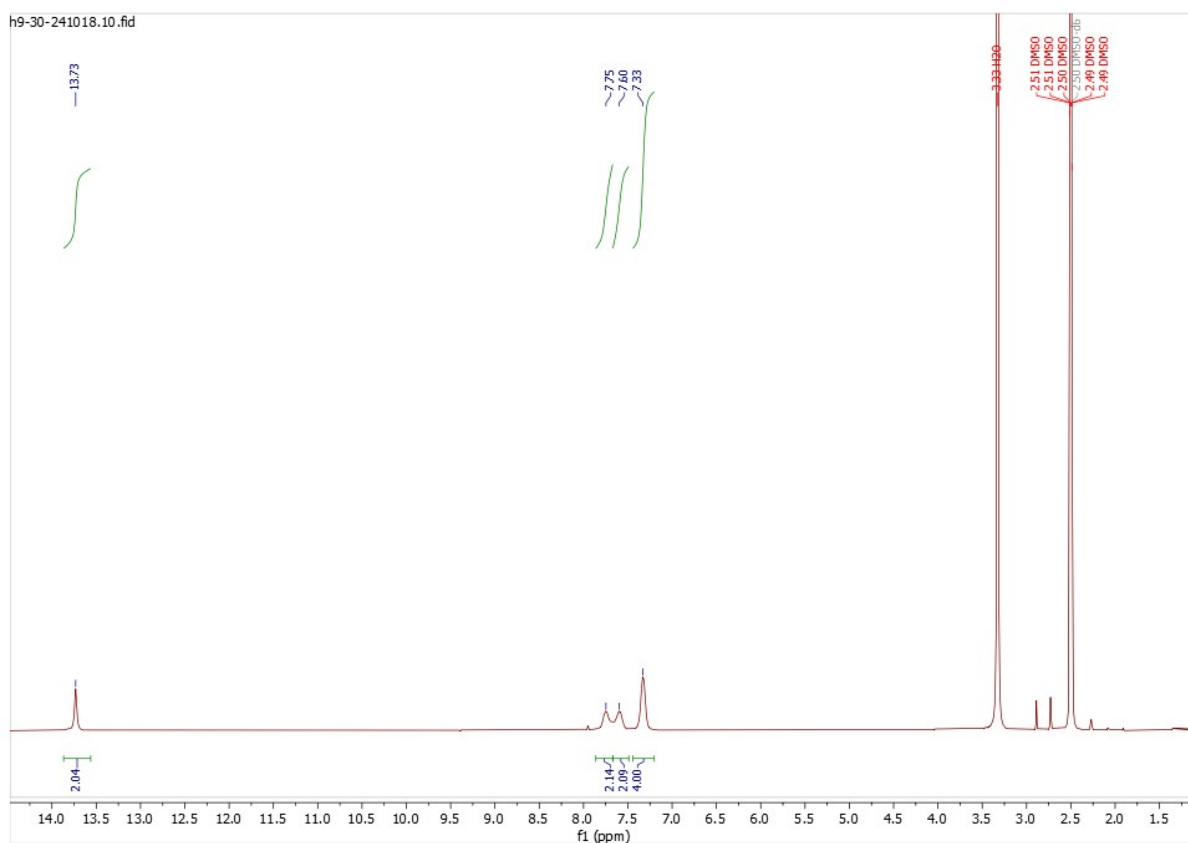

**Figure S1.**  $^1\text{H}$  NMR (300 MHz,  $\text{DMSO}-d_6$ , 298 K) spectrum recorded for compound **L1**.

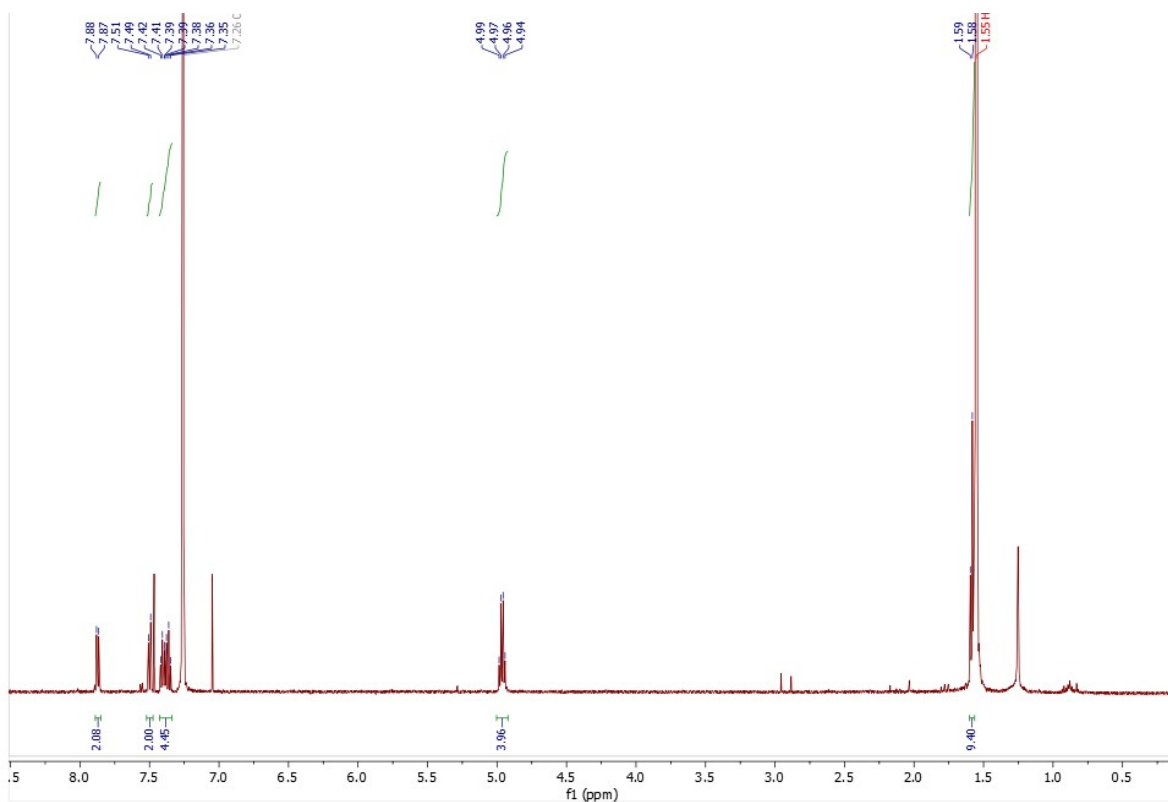

**Figure S2.**  $^1\text{H}$  NMR (300 MHz,  $\text{CDCl}_3$ , 298 K) spectrum recorded for compound **L2**.

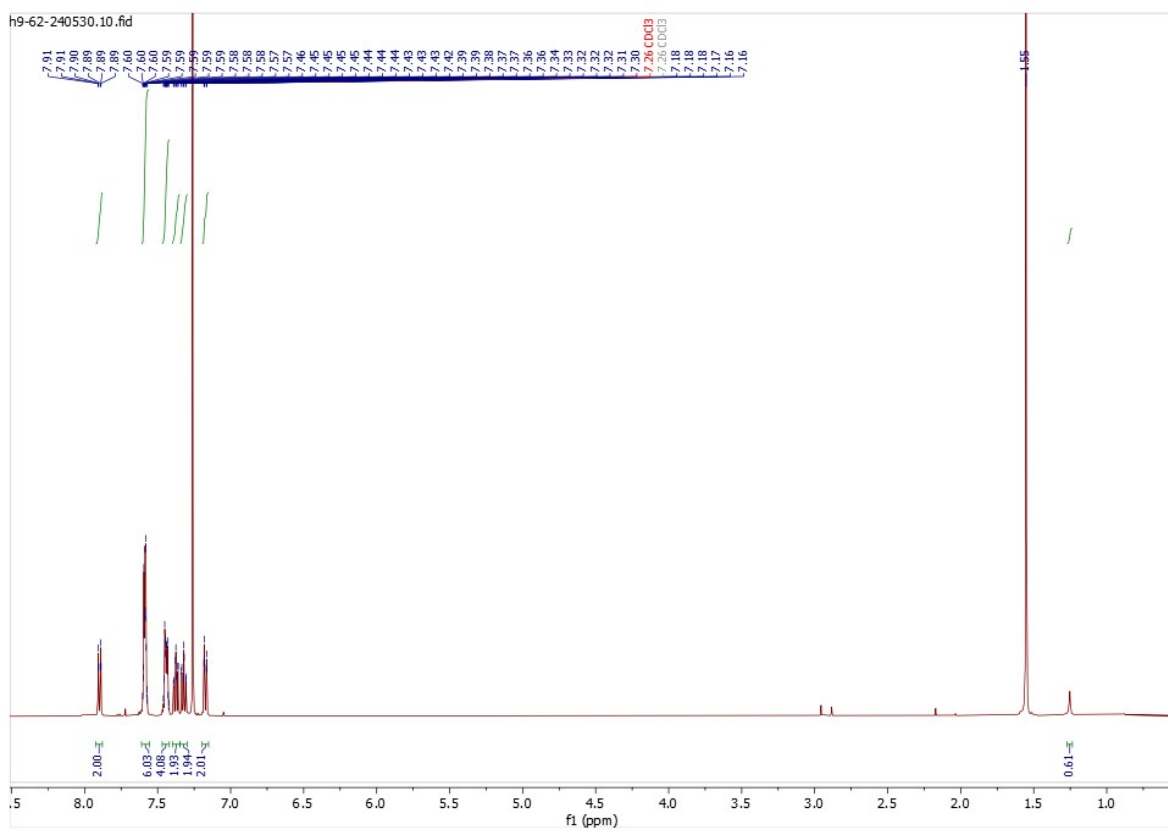

**Figure S3.**  $^1\text{H}$  NMR (300 MHz,  $\text{CDCl}_3$ , 298 K) spectrum recorded for compound **L3**.

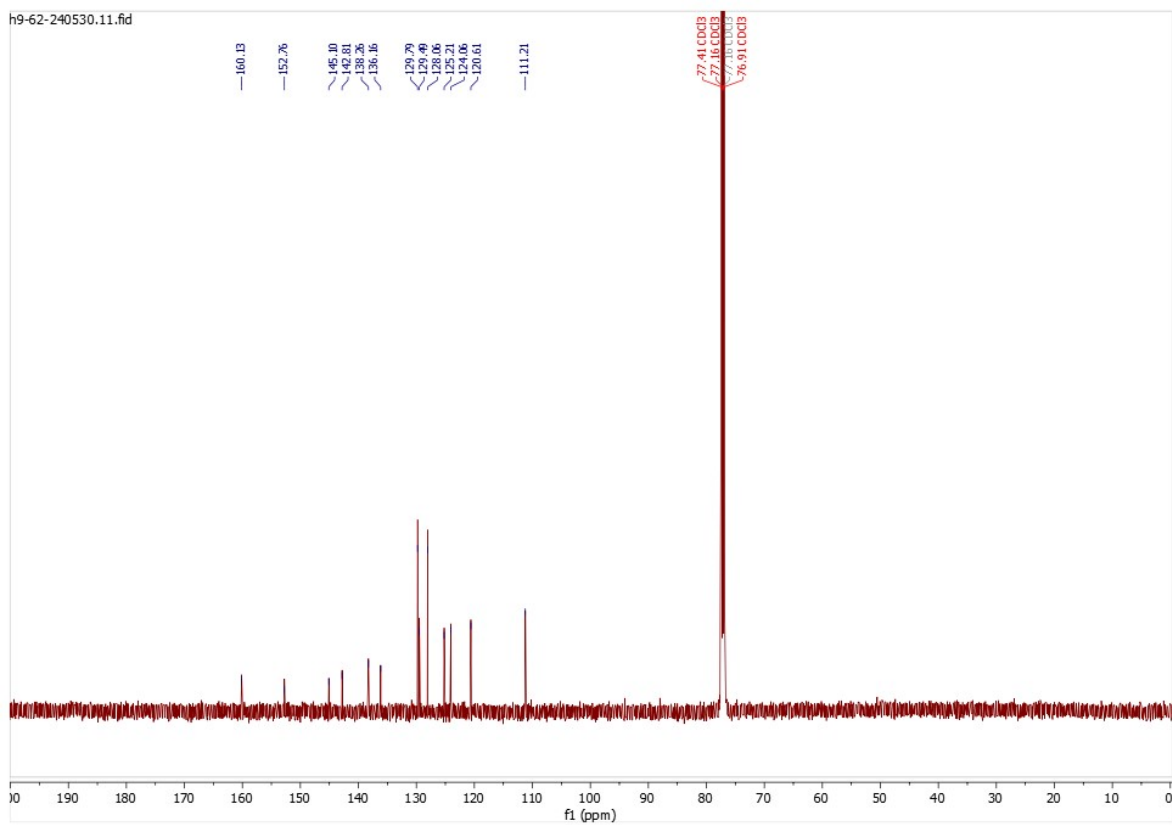

Figure S4.  $^{13}\text{C}\{^1\text{H}\}$  NMR (125 MHz,  $\text{CDCl}_3$ , 298 K) spectrum recorded for compound **L3**.

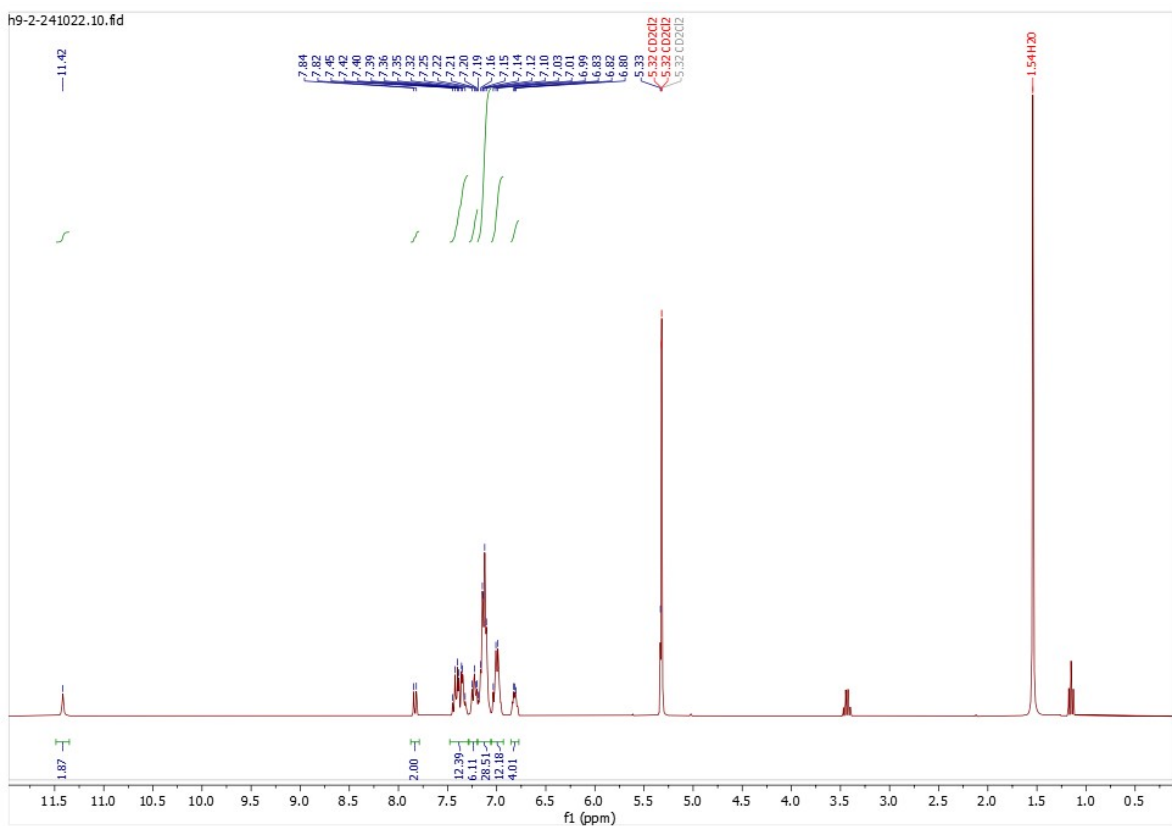

Figure S5.  $^1\text{H}$  NMR (300 MHz,  $\text{CD}_2\text{Cl}_2$ , 298 K) spectrum recorded for compound **Cu1**.

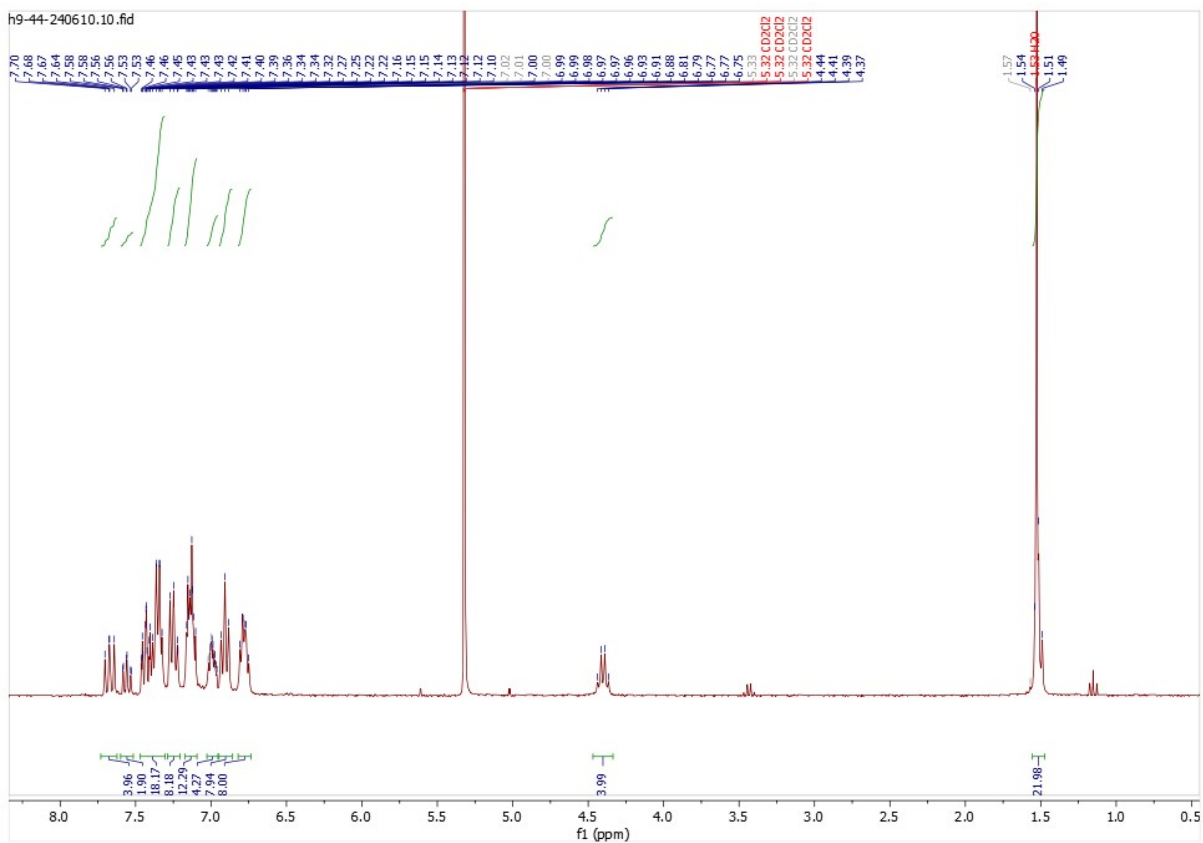

Figure S6.  $^1\text{H}$  NMR (300 MHz,  $\text{CD}_2\text{Cl}_2$ , 298 K) spectrum recorded for compound **Cu2**.

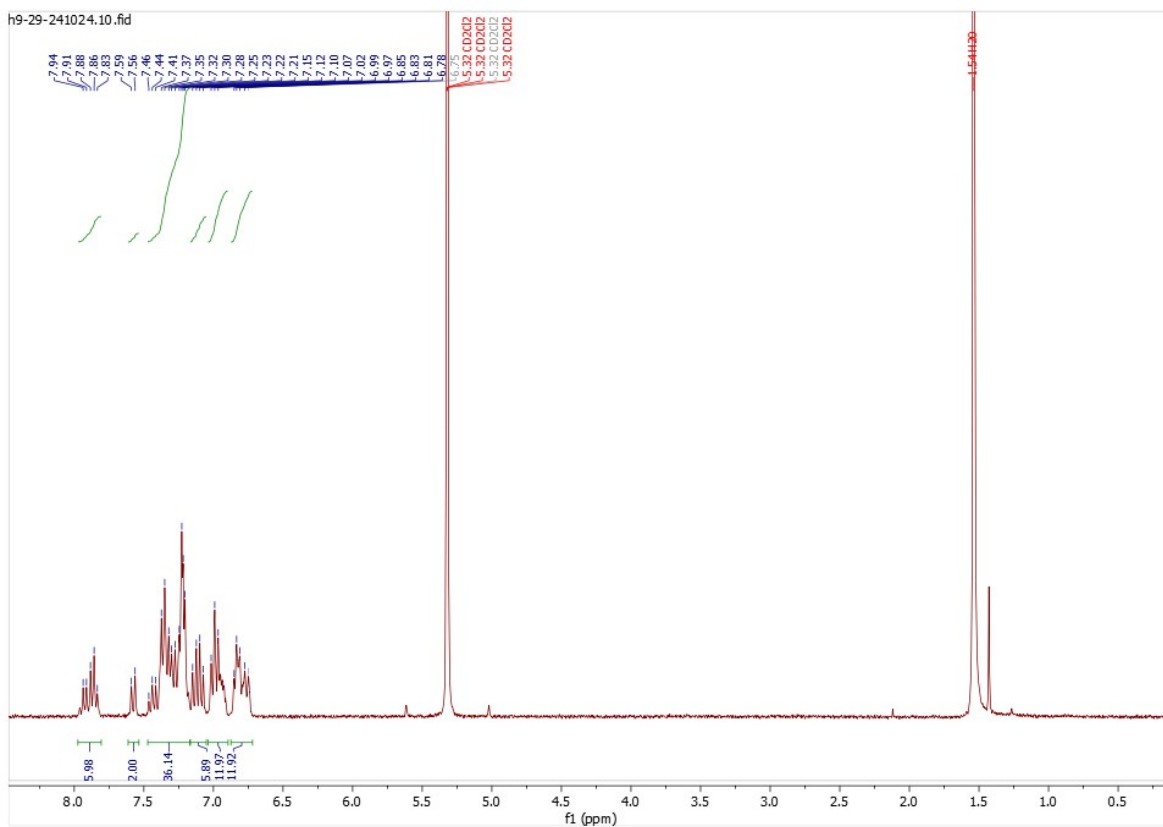

Figure S7.  $^1\text{H}$  NMR (300 MHz,  $\text{CD}_2\text{Cl}_2$ , 298 K) spectrum recorded for compound **Cu3**.

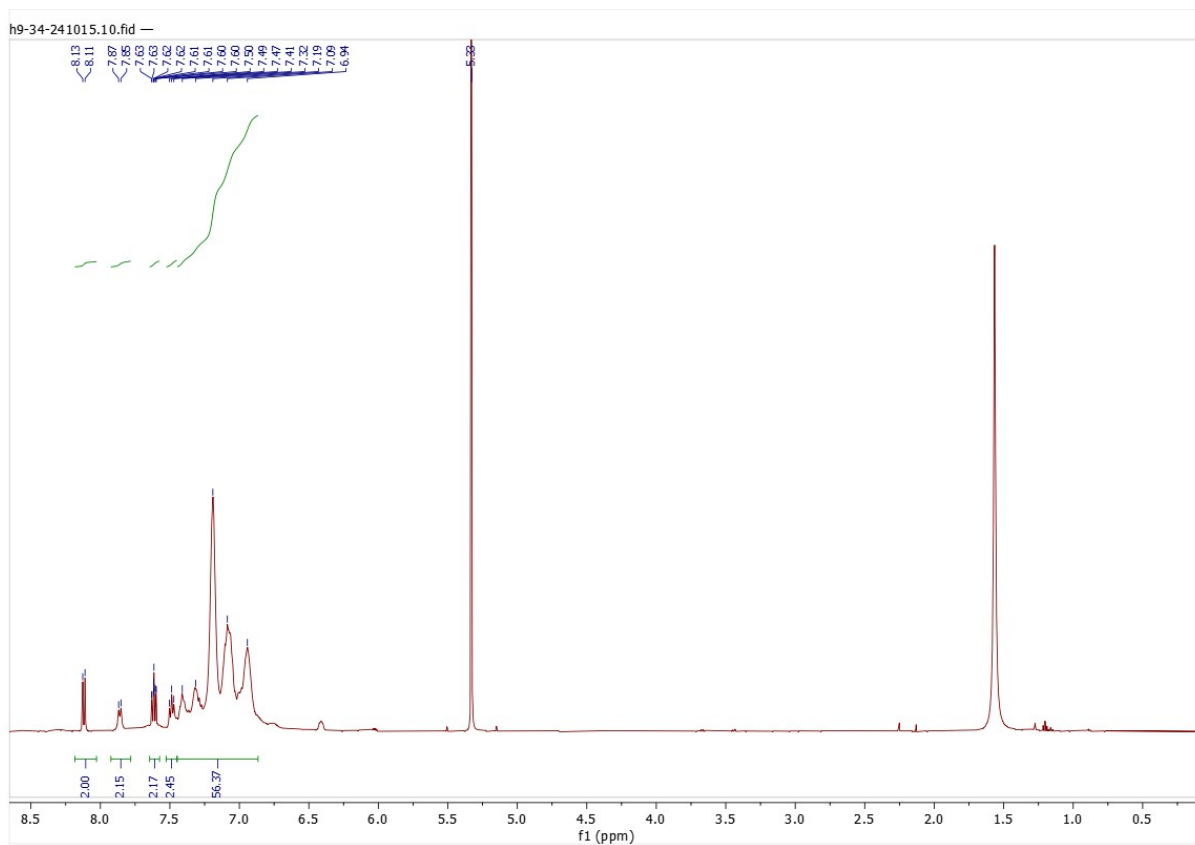

**Figure S8.**  $^1\text{H}$  NMR (500 MHz,  $\text{CD}_2\text{Cl}_2$ , 298 K) spectrum recorded for compound **Cu4**.

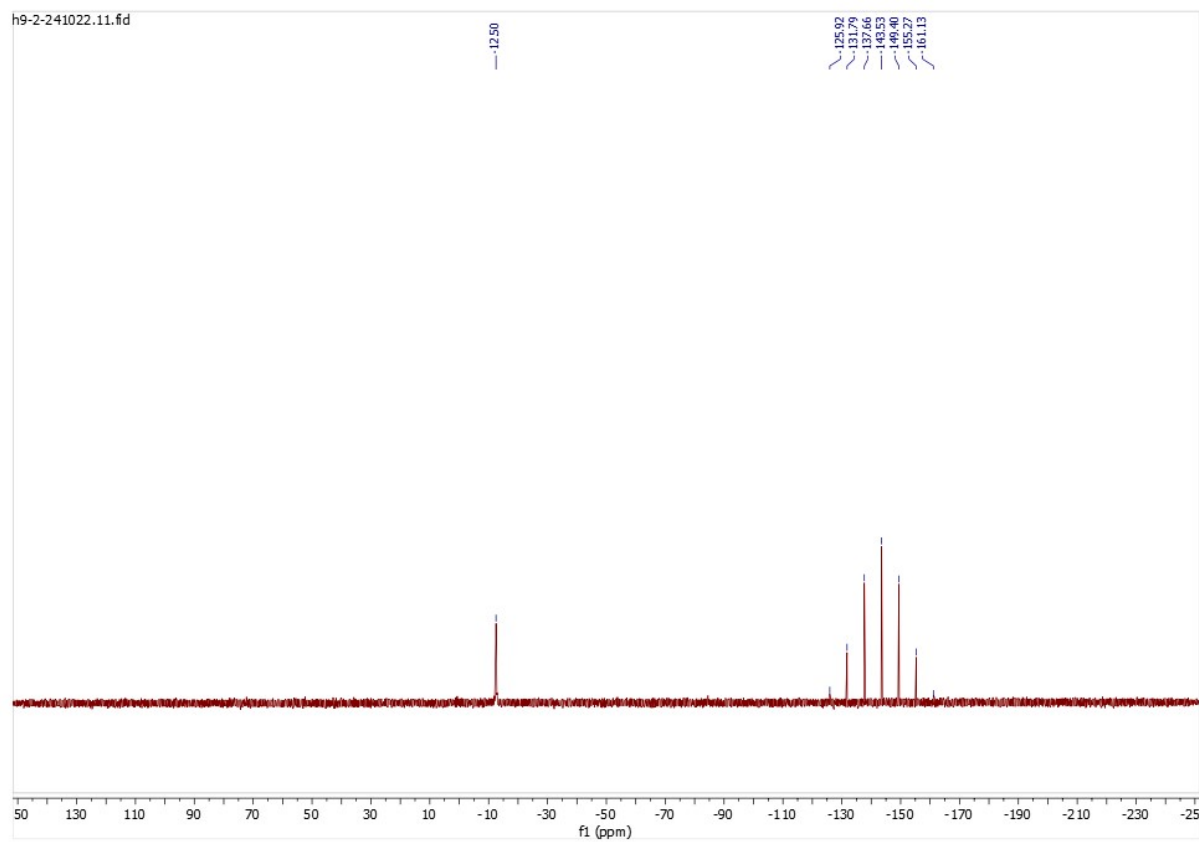

**Figure S9.**  $^{31}\text{P}\{^1\text{H}\}$  NMR (121 MHz,  $\text{CD}_2\text{Cl}_2$ , 298 K) spectrum recorded for compound **Cu1**.

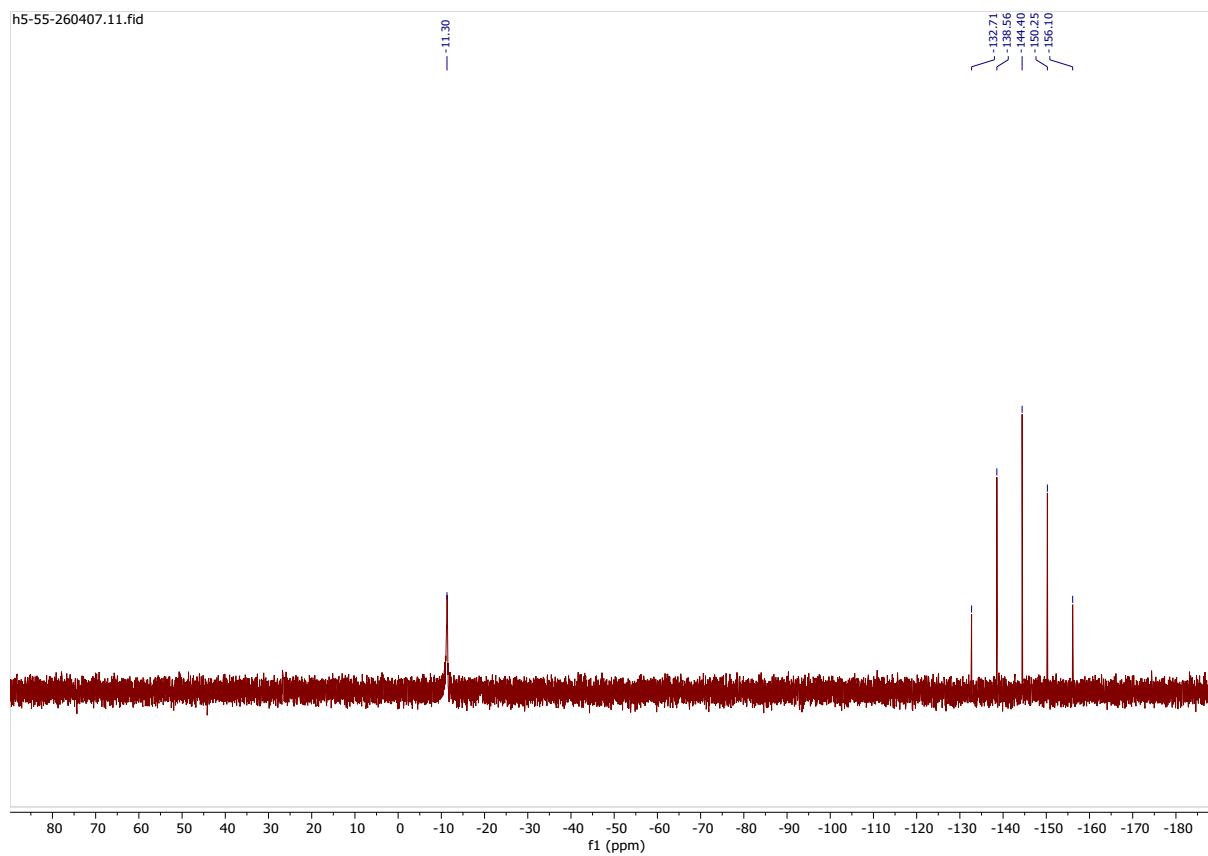

**Figure S10.**  $^{31}\text{P}\{^1\text{H}\}$  NMR (121 MHz,  $\text{CD}_2\text{Cl}_2$ , 298 K) spectrum recorded for compound **Cu2**.

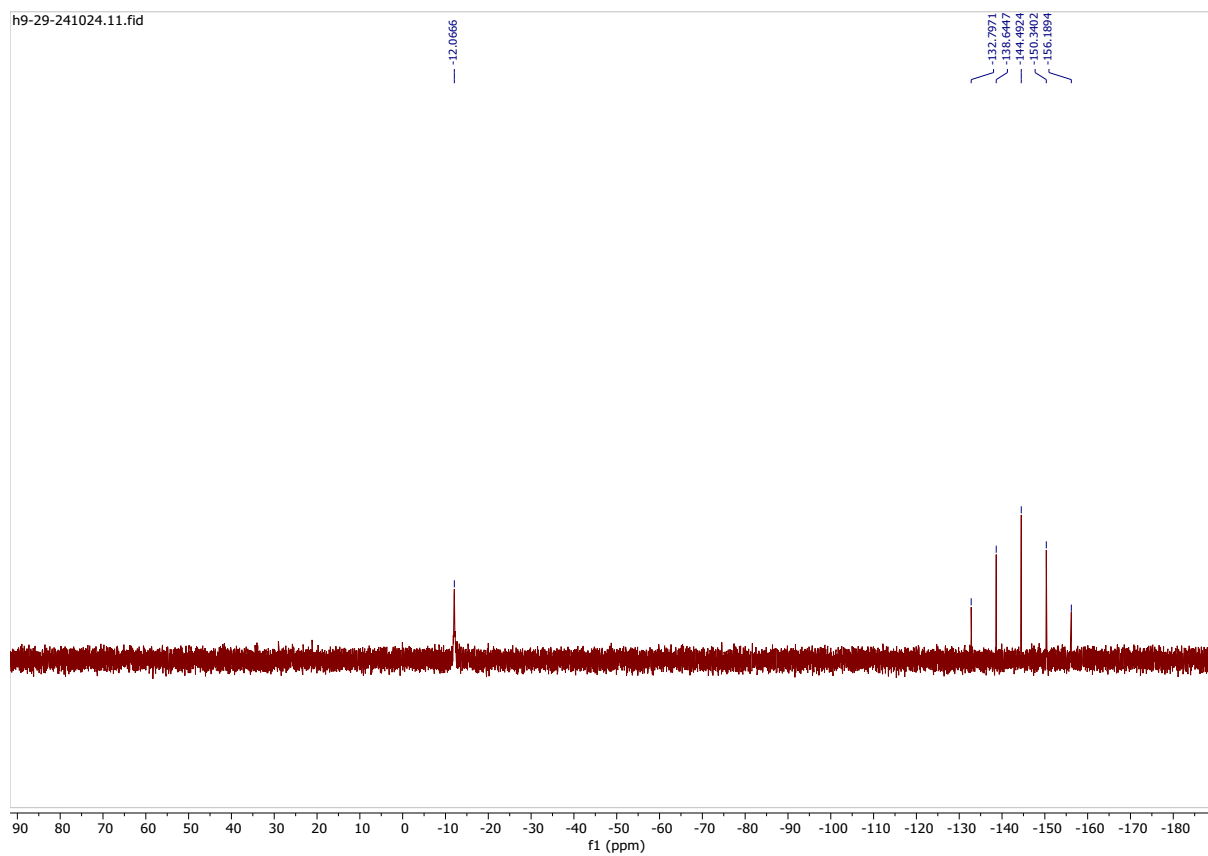

**Figure S11.**  $^{31}\text{P}\{^1\text{H}\}$  NMR (121 MHz,  $\text{CD}_2\text{Cl}_2$ , 298 K) spectrum recorded for compound **Cu3**.

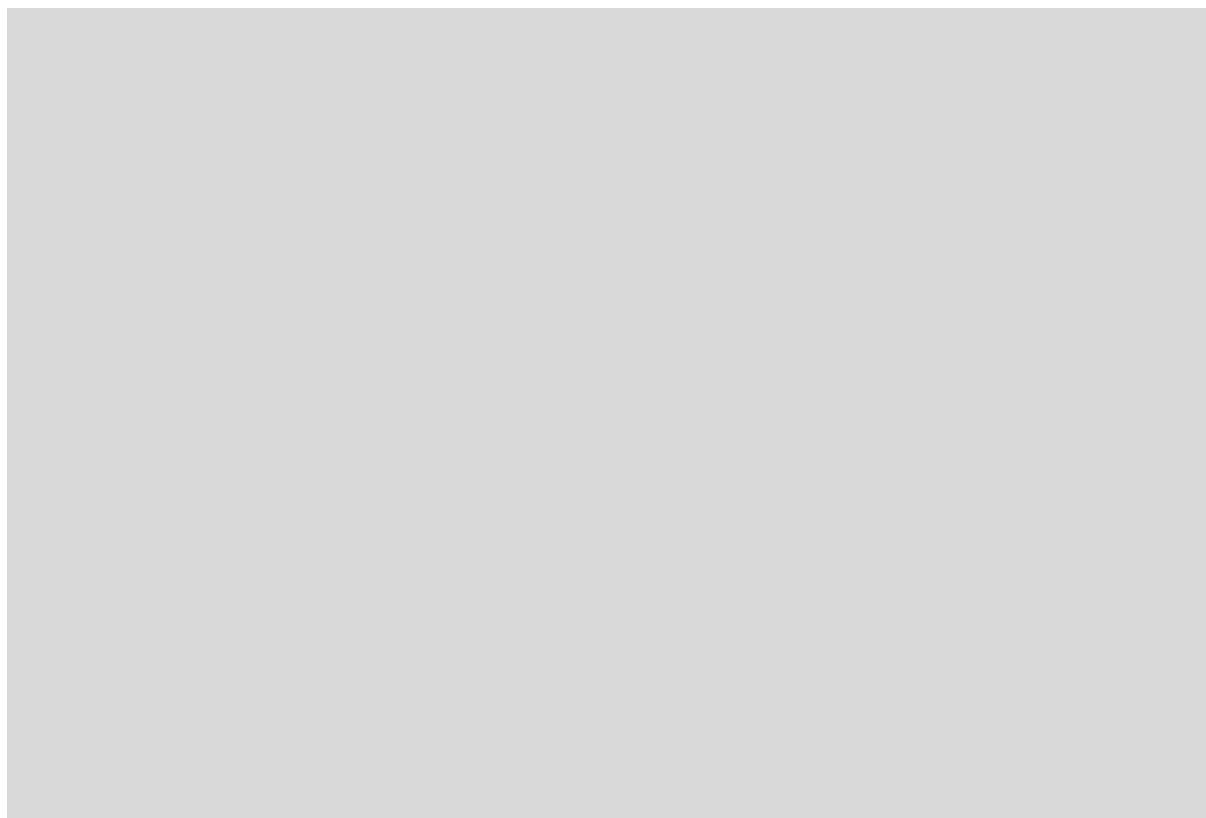

**Figure S12.**  $^{31}\text{P}\{^1\text{H}\}$  NMR (121 MHz,  $\text{CD}_2\text{Cl}_2$ , 298 K) spectrum recorded for compound **Cu4**.

### HR-MS-ESI spectra

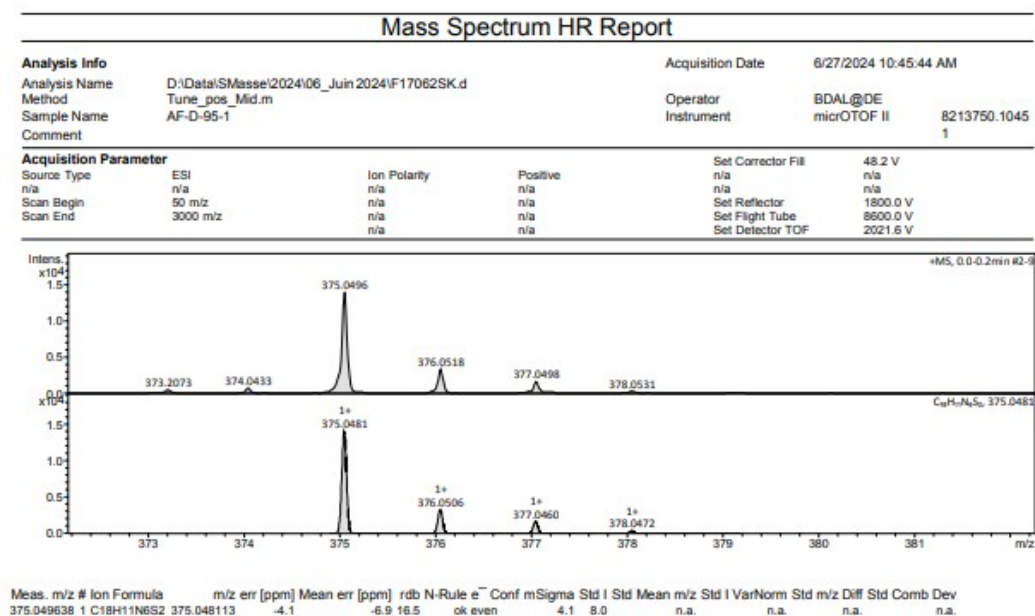

Figure S13. HR-ESI-MS spectrum recorded for compound L1.

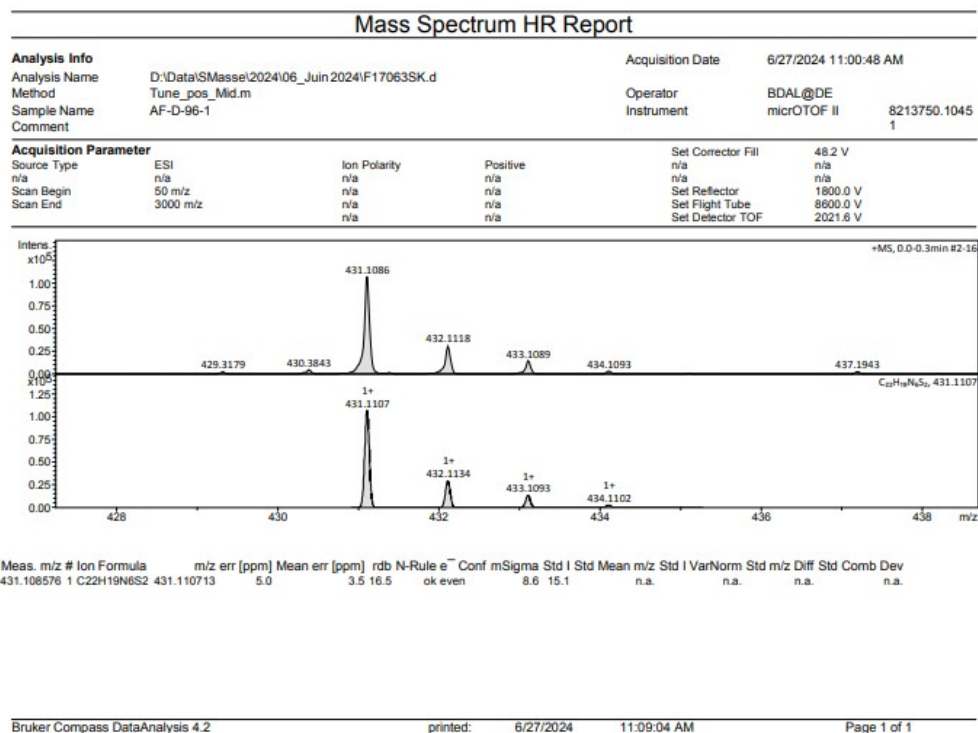

Figure S14. HR-ESI-MS spectrum recorded for compound L2.

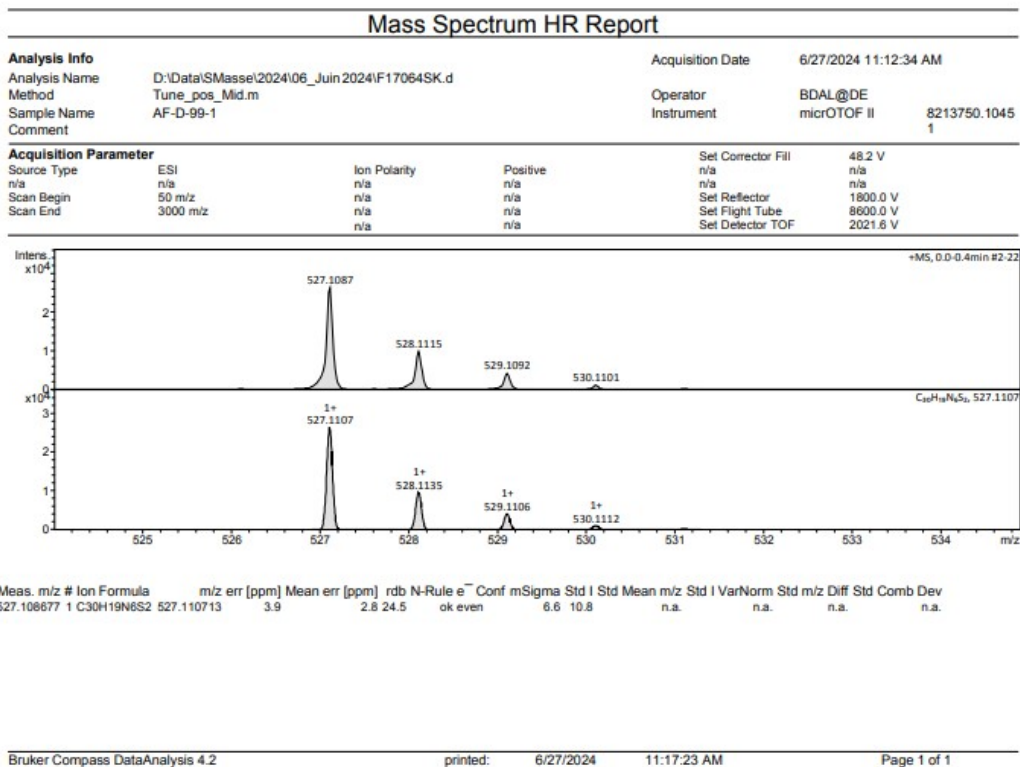

Figure S15. HR-ESI-MS spectrum recorded for compound L3.

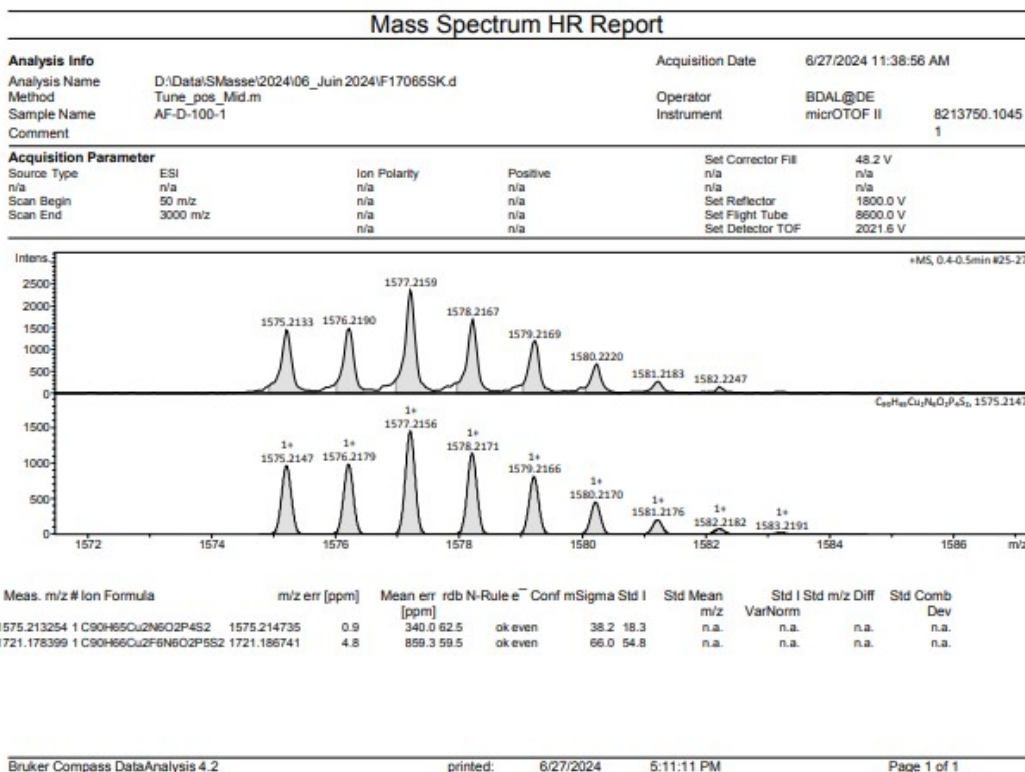

Figure S16. HR-ESI-MS spectrum recorded for compound Cu1.

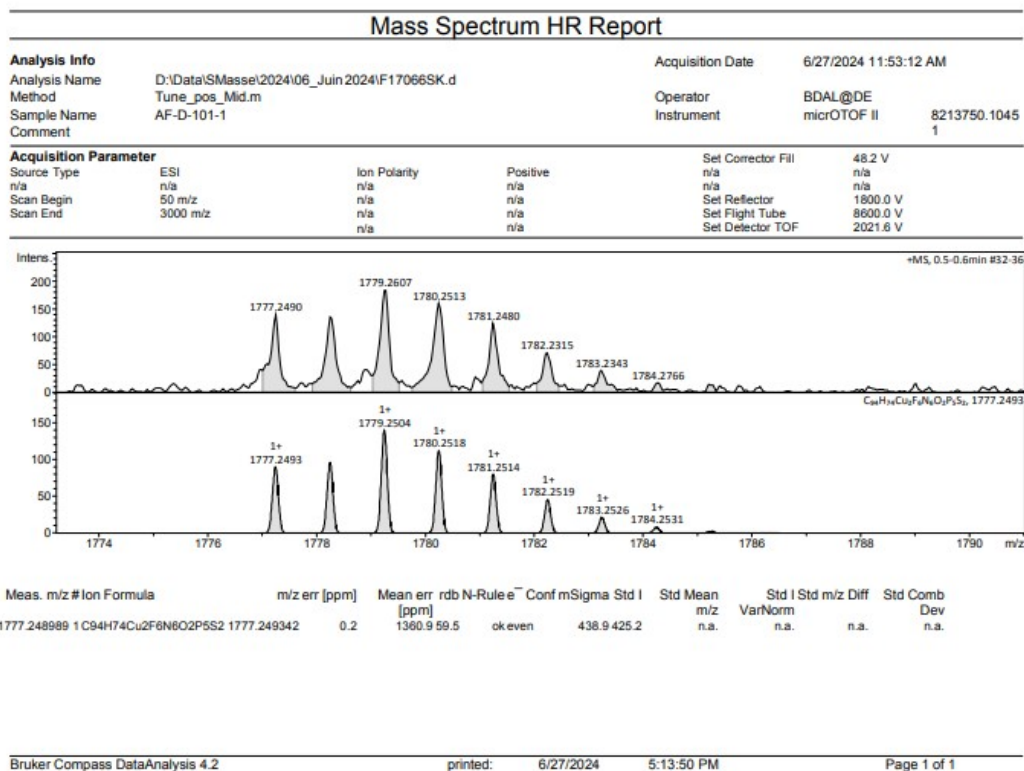

Figure S17. HR-ESI-MS spectrum recorded for compound Cu2.

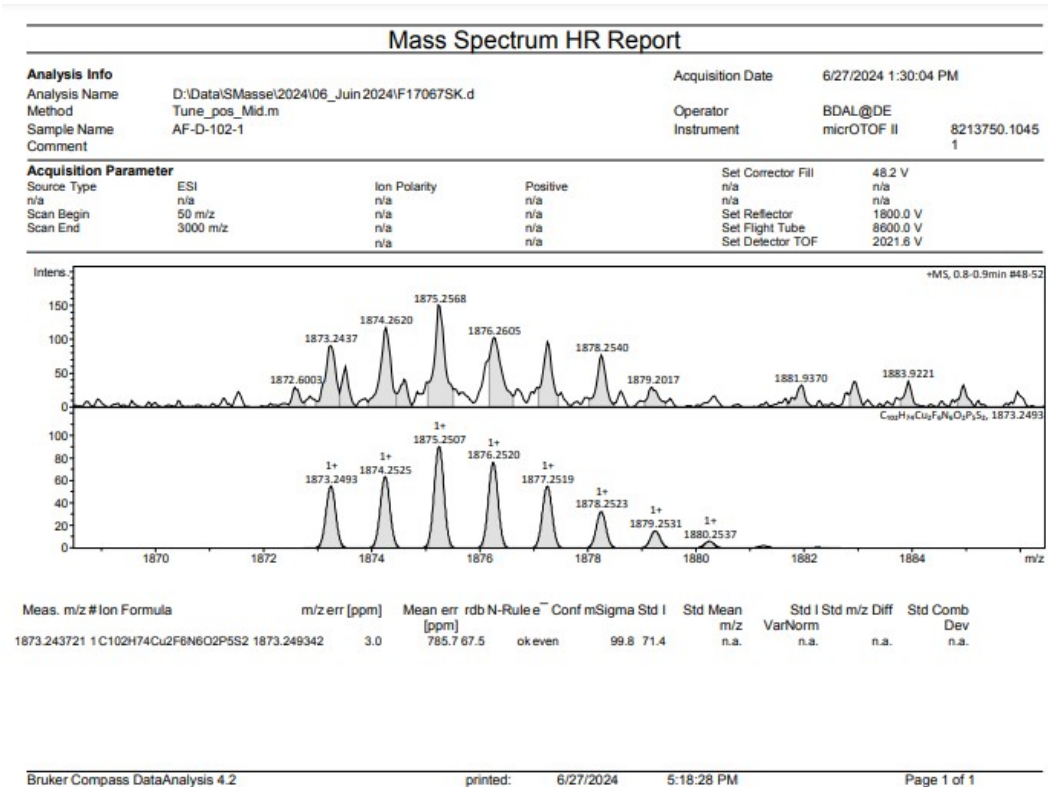

Figure S18. HR-ESI-MS spectrum recorded for compound Cu3.

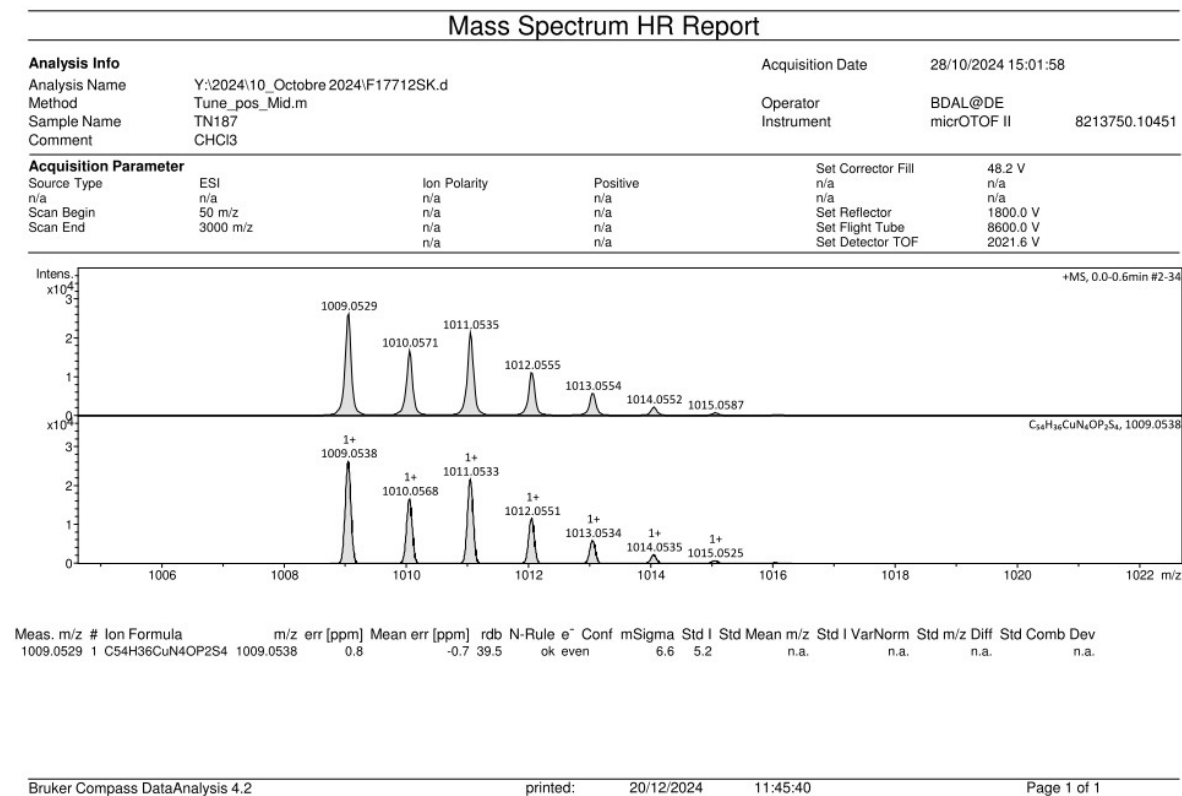

Figure S19. HR-ESI-MS spectrum recorded for compound Cu4.



## Single crystal X-ray diffractometric analysis

Deposition numbers CCDC 2402732 (**L3**), 2402729 (**Cu1**), 2402730 (**Cu2**), 2402731 (**Cu3**), and CCDC 2412038 (**Cu4**) contain the supplementary crystallographic data for this paper. These data are provided free of charge by the joint Cambridge Crystallographic Data Centre and Fachinformationszentrum Karlsruhe [Access Structures](#) service.

For all compounds, X-ray diffraction data collection was carried out on a Bruker PHOTON-III DUO CPAD diffractometer equipped with an Oxford Cryosystem liquid N<sub>2</sub> device, using Mo-K $\alpha$  radiation ( $\lambda = 0.71073 \text{ \AA}$ ). The crystal-detector distance was 40 mm. The cell parameters were determined (APEX4 software)<sup>2</sup> from reflections taken from one set of 180 frames, each at 1 second exposure. The structures were solved using the program SHELXT-2018.<sup>3</sup> The refinement and all further calculations were carried out using SHELXL-2019.<sup>4</sup> The H-atoms were included in calculated positions and treated as riding atoms using SHELXL default parameters. The non-H atoms were refined anisotropically, using weighted full-matrix least-squares on  $F^2$ . A semi-empirical absorption correction was applied using SADABS in APEX4<sup>2</sup>; transmission factors:  $T_{\min}/T_{\max} = 0.6970/0.7456$ . The SQUEEZE instruction in PLATON was applied.<sup>5</sup> The residual electron density was assigned to one molecule of solvent.

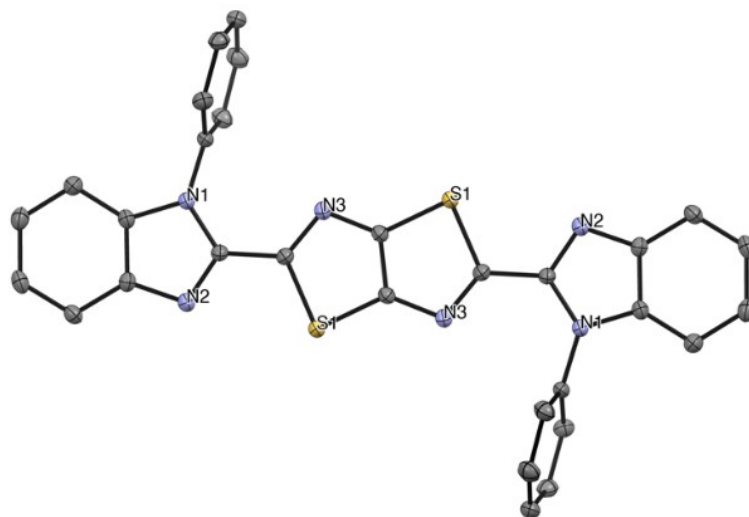

**Figure S20.** ORTEP diagram obtained for the ligand **L3** by means of single crystal X-ray diffractometric analysis. Thermal ellipsoids are shown at 50% probability level. Solvent molecules are omitted for clarity.

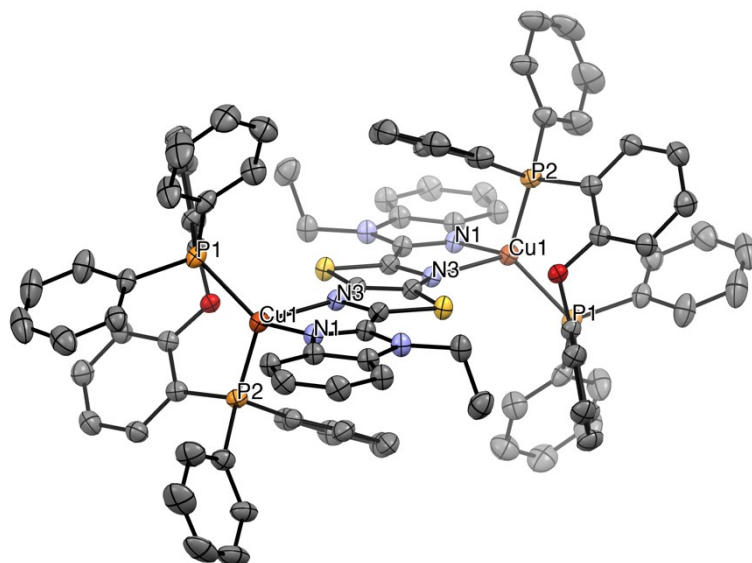

**Figure S21.** ORTEP diagram obtained for the complex **Cu2** by means of single crystal X-ray diffractometric analysis. Thermal ellipsoids are shown at 50% probability level.  $\text{PF}_6^-$  anions and solvent molecules are omitted for clarity.

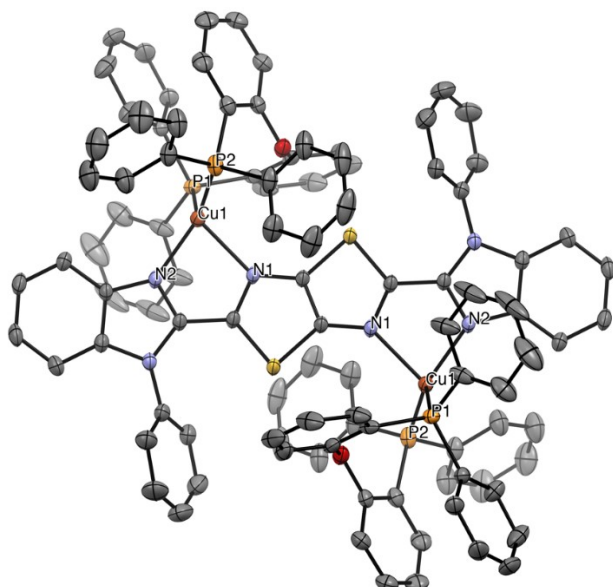

**Figure S22.** ORTEP diagram obtained for the complex **Cu3** by means of single crystal X-ray diffractometric analysis. Thermal ellipsoids are shown at 50% probability level.  $\text{PF}_6^-$  anions and solvent molecules are omitted for clarity.

**Table S1.** Crystal data and structure refinement for compound **L3** (CCDC 2402732).

|                                      |                                                                  |                              |
|--------------------------------------|------------------------------------------------------------------|------------------------------|
| Identification code                  | <b>ejaf240624</b>                                                |                              |
| Empirical formula                    | $C_{32}H_{20}Cl_6N_6S_2$<br>$C_{30}H_{18}N_6S_2 \cdot 2(CHCl_3)$ |                              |
| Formula weight                       | 765.36                                                           |                              |
| Temperature                          | 120(2) K                                                         |                              |
| Wavelength                           | 0.71073 Å                                                        |                              |
| Crystal system, space group          | Triclinic, P-1                                                   |                              |
| Unit cell dimensions                 | $a = 9.6871(3)$ Å                                                | $\alpha = 62.7580(10)^\circ$ |
|                                      | $b = 10.3449(3)$ Å                                               | $\beta = 64.7870(10)^\circ$  |
|                                      | $c = 10.6679(4)$ Å                                               | $\gamma = 65.5400(10)^\circ$ |
| Volume                               | 827.42(5) Å <sup>3</sup>                                         |                              |
| Z, Calculated density                | 1, 1.536 Mg/m <sup>3</sup>                                       |                              |
| Absorption coefficient               | 0.680 mm <sup>-1</sup>                                           |                              |
| F(000)                               | 388                                                              |                              |
| Crystal size                         | 0.180 x 0.080 x 0.080 mm                                         |                              |
| Theta range for data collection      | 2.245 to 27.941°.                                                |                              |
| Limiting indices                     | -12 ≤ h ≤ 12, -13 ≤ k ≤ 13, -14 ≤ l ≤ 14                         |                              |
| Reflections collected / unique       | 33923 / 3962 [R(int) = 0.0420]                                   |                              |
| Completeness to theta = 25.242       | 99.9%                                                            |                              |
| Absorption correction                | Semi-empirical from equivalents                                  |                              |
| Max. and min. transmission           | 0.7456 and 0.7074                                                |                              |
| Refinement method                    | Full-matrix least-squares on $F^2$                               |                              |
| Data / restraints / parameters       | 3962 / 0 / 208                                                   |                              |
| Goodness-of-fit on $F^2$             | 020                                                              |                              |
| Final R indices [ $I > 2\sigma(I)$ ] | R1 = 0.0363, wR2 = 0.0836                                        |                              |
| R indices (all data)                 | R1 = 0.0464, wR2 = 0.0903                                        |                              |
| Extinction coefficient               | n/a                                                              |                              |
| Largest diff. peak and hole          | 0.734 and -0.693 e Å <sup>-3</sup>                               |                              |

**Table S2.** Crystal data and structure refinement for compound **Cu1** (CCDC 2402729).

|                                 |                                                                                                                            |                     |
|---------------------------------|----------------------------------------------------------------------------------------------------------------------------|---------------------|
| Identification code             | <b>ejaf240619_02</b>                                                                                                       |                     |
| Empirical formula               | $C_{191} H_{158} Cu_4 F_{24} N_{12} O_7 P_{12} S_4$<br>$2(C_{90}H_{66}Cu_2N_6O_2 P_4S_2), 4(F_6P), C_3H_6O, 2(C_4H_{10}O)$ |                     |
| Formula weight                  | 3943.32                                                                                                                    |                     |
| Temperature                     | 120(2) K                                                                                                                   |                     |
| Wavelength                      | 0.71073 Å                                                                                                                  |                     |
| Crystal system, space group     | Orthorhombic, P b c a                                                                                                      |                     |
| Unit cell dimensions            | $a = 20.6107(6)$ Å                                                                                                         | $\alpha = 90^\circ$ |
|                                 | $b = 20.4616(6)$ Å                                                                                                         | $\beta = 90^\circ$  |
|                                 | $c = 42.7737(15)$ Å                                                                                                        | $\gamma = 90^\circ$ |
| Volume                          | 18038.9(10) Å <sup>3</sup>                                                                                                 |                     |
| Z, Calculated density           | 4, 1.452 Mg/m <sup>3</sup>                                                                                                 |                     |
| Absorption coefficient          | 0.704 mm <sup>-1</sup>                                                                                                     |                     |
| F(000)                          | 8080                                                                                                                       |                     |
| Crystal size                    | 0.200 x 0.140 x 0.120 mm                                                                                                   |                     |
| Theta range for data collection | 1.991 to 27.912°.                                                                                                          |                     |
| Limiting indices                | $-27 \leq h \leq 27, -26 \leq k \leq 26, -56 \leq l \leq 56$                                                               |                     |
| Reflections collected / unique  | 485640 / 21578 [R(int) = 0.0880]                                                                                           |                     |
| Completeness to theta = 25.242  | 100.0%                                                                                                                     |                     |
| Absorption correction           | Semi-empirical from equivalents                                                                                            |                     |
| Max. and min. transmission      | 0.7456 and 0.7107                                                                                                          |                     |
| Refinement method               | Full-matrix least-squares on $F^2$                                                                                         |                     |
| Data / restraints / parameters  | 21578 / 3 / 1157                                                                                                           |                     |
| Goodness-of-fit on $F^2$        | 002                                                                                                                        |                     |
| Final R indices [ $I > 2$ ]     | R1 = 0.0715, wR2 = 0.1310                                                                                                  |                     |
| Extinction coefficient          | n/a                                                                                                                        |                     |
| Largest diff. peak and hole     | 1.244 and -1.097 $e$ Å <sup>-3</sup>                                                                                       |                     |

**Table S3.** Crystal data and structure refinement for compound **Cu2** (CCDC 2402730).

|                                      |                                                                                                                |                              |
|--------------------------------------|----------------------------------------------------------------------------------------------------------------|------------------------------|
| Identification code                  | <b>ejaf240618</b>                                                                                              |                              |
| Empirical formula                    | $C_{98}H_{80}Cl_{10}Cu_2F_{12}N_6O_2P_6S_2$<br>$C_{94}H_{74}Cu_2N_6O_2P_4S_2, 2(F_6P), 2(CHCl_3), 2(CH_2Cl_2)$ |                              |
| Formula weight                       | 2333.20                                                                                                        |                              |
| Temperature                          | 120(2) K                                                                                                       |                              |
| Wavelength                           | 0.71073 Å                                                                                                      |                              |
| Crystal system, space group          | Monoclinic, P 21/c                                                                                             |                              |
| Unit cell dimensions                 | $a = 13.5566(5)$ Å                                                                                             | $\alpha = 90^\circ$          |
|                                      | $b = 13.1464(4)$ Å                                                                                             | $\beta = 102.5990(10)^\circ$ |
|                                      | $c = 29.0943(10)$ Å                                                                                            | $\gamma = 90^\circ$          |
| Volume                               | 5060.3(3) Å <sup>3</sup>                                                                                       |                              |
| Z, Calculated density                | 2, 1.531 Mg/m <sup>3</sup>                                                                                     |                              |
| Absorption coefficient               | 0.895 mm <sup>-1</sup>                                                                                         |                              |
| F(000)                               | 2368                                                                                                           |                              |
| Crystal size                         | 0.200 x 0.120 x 0.060 mm                                                                                       |                              |
| Theta range for data collection      | 2.111 to 27.956°.                                                                                              |                              |
| Limiting indices                     | $17 \leq h \leq 17, -17 \leq k \leq 17, -38 \leq l \leq 38$                                                    |                              |
| Reflections collected / unique       | 279045 / 12142 [R(int) = 0.0853]                                                                               |                              |
| Completeness to theta = 25.242       | 99.9%                                                                                                          |                              |
| Absorption correction                | Semi-empirical from equivalents                                                                                |                              |
| Max. and min. transmission           | 0.7456 and 0.6862                                                                                              |                              |
| Refinement method                    | Full-matrix least-squares on $F^2$                                                                             |                              |
| Data / restraints / parameters       | 12142 / 21 / 625                                                                                               |                              |
| Goodness-of-fit on $F^2$             | 1.024                                                                                                          |                              |
| Final R indices [ $I > 2\sigma(I)$ ] | R1 = 0.0798, wR2 = 0.2081                                                                                      |                              |
| R indices (all data)                 | R1 = 0.1005, wR2 = 0.2266                                                                                      |                              |
| Extinction coefficient               | 0.0042(5)                                                                                                      |                              |
| Largest diff. peak and hole          | 1.799 and -1.921 e Å <sup>-3</sup>                                                                             |                              |

**Table S4.** Crystal data and structure refinement for compound **Cu3** (CCDC 2402731).

|                                      |                                                                                                    |                              |
|--------------------------------------|----------------------------------------------------------------------------------------------------|------------------------------|
| Identification code                  | <b>ejaf240619sq</b>                                                                                |                              |
| Empirical formula                    | $C_{108}H_{86}Cu_2F_{12}N_6O_4P_6S_2$ , solvent                                                    |                              |
|                                      | $C_{102}H_{74}Cu_2N_6O_2P_4S_2$ , 2(F <sub>6</sub> P), 2(C <sub>3</sub> H <sub>6</sub> O), solvent |                              |
| Formula weight                       | 2136.84                                                                                            |                              |
| Temperature                          | 120(2) K                                                                                           |                              |
| Wavelength                           | 0.71073 Å                                                                                          |                              |
| Crystal system, space group          | Triclinic, P -1                                                                                    |                              |
| Unit cell dimensions                 | $a = 12.2112(3)$ Å                                                                                 | $\alpha = 87.6250(10)^\circ$ |
|                                      | $b = 14.9814(5)$ Å                                                                                 | $\beta = 69.3170(10)^\circ$  |
|                                      | $c = 15.6492(5)$ Å                                                                                 | $\gamma = 86.6330(10)^\circ$ |
| Volume                               | 2673.08(14) Å <sup>3</sup>                                                                         |                              |
| Z, Calculated density                | 1, 1.327 Mg/m <sup>3</sup>                                                                         |                              |
| Absorption coefficient               | 0.600 mm <sup>-1</sup>                                                                             |                              |
| F(000)                               | 1096                                                                                               |                              |
| Crystal size                         | 0.180 x 0.140 x 0.080 mm                                                                           |                              |
| Theta range for data collection      | 1.925 to 27.939°.                                                                                  |                              |
| Limiting indices                     | -16 ≤ h ≤ 15, -19 ≤ k ≤ 19, -20 ≤ l ≤ 20                                                           |                              |
| Reflections collected / unique       | 99913 / 12801 [R(int) = 0.0373]                                                                    |                              |
| Completeness to theta = 25.242       | 100.0%                                                                                             |                              |
| Absorption correction                | Semi-empirical from equivalents                                                                    |                              |
| Max. and min. transmission           | 0.7456 and 0.7115                                                                                  |                              |
| Refinement method                    | Full-matrix least-squares on $F^2$                                                                 |                              |
| Data / restraints / parameters       | 12801 / 6 / 633                                                                                    |                              |
| Goodness-of-fit on $F^2$             | 1.026                                                                                              |                              |
| Final R indices [ $I > 2\sigma(I)$ ] | R1 = 0.0539, wR2 = 0.1458                                                                          |                              |
| R indices (all data)                 | R1 = 0.0611, wR2 = 0.1524                                                                          |                              |
| Extinction coefficient               | n/a                                                                                                |                              |
| Largest diff. peak and hole          | 1.770 and -1.240 e Å <sup>-3</sup>                                                                 |                              |

**Table S5.** Crystal data and structure refinement for compound **Cu4** (CCDC 2412038).

|                                             |                                                                                                                                       |         |
|---------------------------------------------|---------------------------------------------------------------------------------------------------------------------------------------|---------|
| Identification code                         | ejaj231214sq                                                                                                                          |         |
| Empirical formula                           | C <sub>90</sub> H <sub>64</sub> Cu <sub>2</sub> F <sub>12</sub> N <sub>4</sub> O <sub>2</sub> P <sub>6</sub> S <sub>4</sub> , solvent |         |
|                                             | C <sub>90</sub> H <sub>64</sub> Cu <sub>2</sub> N <sub>4</sub> O <sub>2</sub> P <sub>4</sub> S <sub>4</sub> , 2(F6 P) [+ solvent]     |         |
| Formula weight                              | 1902.59                                                                                                                               |         |
| Temperature                                 | 293(2) K                                                                                                                              |         |
| Wavelength                                  | 1.54178 Å                                                                                                                             |         |
| Crystal system, space group                 | Orthorhombic, Pccn                                                                                                                    |         |
| Unit cell dimensions                        | a = 14.7964(13) Å                                                                                                                     | α = 90° |
|                                             | b = 20.192(2) Å                                                                                                                       | β = 90° |
|                                             | c = 31.462(3) Å                                                                                                                       | γ = 90° |
| Volume                                      | 9400.1(15) Å <sup>3</sup>                                                                                                             |         |
| Z, Calculated density                       | 4, 1.344 Mg/ m <sup>3</sup>                                                                                                           |         |
| Absorption coefficient                      | 2.958 mm <sup>-1</sup>                                                                                                                |         |
| F(000)                                      | 3872                                                                                                                                  |         |
| Crystal size                                | 0.150 x 0.130 x 0.120 mm                                                                                                              |         |
| Theta range for data collection             | 2.809 to 66.597°g.                                                                                                                    |         |
| Limiting indices                            | -17<=h<=12, -24<=k<=24, -36<=l<=37                                                                                                    |         |
| Reflections collected / unique              | 48088 / 8314 [R(int) = 0.1527]                                                                                                        |         |
| Completeness to theta = 66.597              | 100.0%                                                                                                                                |         |
| Absorption correction                       | Semi-empirical from equivalents                                                                                                       |         |
| Max. and min. transmission                  | 0.7528 and 0.2776                                                                                                                     |         |
| Refinement method                           | Full-matrix least-squares on <i>F</i> <sup>2</sup>                                                                                    |         |
| Data / restraints / parameters              | 8314 / 29 / 506                                                                                                                       |         |
| Goodness-of-fit on <i>F</i> <sup>2</sup>    | 1.035                                                                                                                                 |         |
| Final R indices [ <i>I</i> >2σ( <i>I</i> )] | R1 = 0.0803, wR2 = 0.2186                                                                                                             |         |
| R indices (all data)                        | R1 = 0.1411, wR2 = 0.2635                                                                                                             |         |
| Extinction coefficient                      | n/a                                                                                                                                   |         |
| Largest diff. peak and hole                 | 0.875 and -1.039 e Å <sup>-3</sup>                                                                                                    |         |

## Photophysical measurements

*Instrument details.* Absorption spectra were recorded using a Perkin Elmer Lambda 950 double-beam UV-VIS spectrophotometer and baseline corrected. Steady-state emission spectra were recorded on a Horiba Jobin–Yvon IBH FL-322 Fluorolog 3 spectrometer equipped with a 450 W xenon arc lamp, double-grating excitation, and emission monochromators (2.1 nm mm<sup>-1</sup> of dispersion; 1200 grooves mm<sup>-1</sup>) and a Hamamatsu R13456 red sensitive Peltier-cooled PMT detector. Emission and excitation spectra were corrected for source intensity (lamp and grating) and emission spectral response (detector and grating) by standard correction curves. Time-resolved measurements were performed using either the Time-Correlated Single-Photon Counting (TCSPC) or the Multi-Channel Scaling (MCS) electronics option of the TimeHarp 260 board installed on a PicoQuant FluoTime 300 fluorimeter (PicoQuant GmbH, Germany), equipped with a PDL 820 laser pulse driver. A pulsed laser diode LDH-P-C-375 ( $\lambda = 375$  nm, pulse full width at half maximum <50 ps, repetition rate 200 kHz–40 MHz) was used to excite the sample and mounted directly on the sample chamber at 90°. The photons were collected by a PMA Hybrid-07 single photon counting detector. The data were acquired by using the commercially available software EasyTau II (PicoQuant GmbH, Germany), while data analysis was performed using the built-in software FluoFit (PicoQuant GmbH, Germany). All the solvents were spectrophotometric grade. Deaerated samples were prepared by the freeze–pump–thaw technique by using a home-made quartz cuvette equipped with a Rotaflo stopcock. Luminescence quantum yields were measured in optically dilute solutions (optical density <0.15 at the excitation wavelength) and compared to reference emitter by following the method of Demas and Crosby.<sup>6</sup> The Ru(bpy)<sub>3</sub>Cl<sub>2</sub> complex in air-equilibrated water solution at room temperature was used as reference (PLQY = 0.04).<sup>7</sup> Solid state PLQY values were recorded at a fixed excitation wavelength by using a Hamamatsu Photonics absolute PLQY measurements system Quantaury QY equipped with CW Xenon light source (150 W), monochromator, integrating sphere, C7473 photonics multi-channel analyzer and employing the commercially available U6039-05 PLQY measurement software (Hamamatsu Photonics Ltd., Shizuoka, Japan). All measurements were repeated four times at the excitation wavelength  $\lambda_{\text{exc}} = 360$  nm, unless otherwise stated.

*Methods.* For time resolved measurements, data fitting was performed by employing the maximum likelihood estimation (MLE) methods and the quality of the fit was assessed by inspection of the reduced  $\chi^2$  function and of the weighted residuals. For multi-exponential

decays, the intensity, namely  $I(t)$ , has been assumed to decay as the sum of individual single exponential decays (Eqn. 1):

$$I(t) = \sum_{i=1}^n \alpha_i \exp\left(-\frac{t}{\tau_i}\right) \quad \text{eqn. 1}$$

where  $\tau_i$  are the decay times and  $\alpha_i$  are the amplitude of the component at  $t = 0$ . In the tables, the percentages to the pre-exponential factors,  $\alpha_i$ , are listed upon normalization. Intensity average lifetimes were calculated by using the following equation (Eqn. 2):<sup>8</sup>

$$\bar{\tau} = \frac{a_1\tau_1^2 + a_2\tau_2^2}{a_1\tau_1 + a_2\tau_2} \quad \text{eqn. 2}$$

**Table S6.** Photophysical data recorded for ligands **L1–L4** as neat powders and DCM glassy matrix at 77 K.

| cmpd      | $\lambda_{em}$ [nm]                      |                                    | PLQY (%) |                                | $\tau_{obs}$ (% $A_{rel}$ )     |        | $\bar{\tau}$ [ns] |      | $k_r$ [ $10^8$ s <sup>-1</sup> ] | $k_{nr}$ [ $10^8$ s <sup>-1</sup> ] |
|-----------|------------------------------------------|------------------------------------|----------|--------------------------------|---------------------------------|--------|-------------------|------|----------------------------------|-------------------------------------|
|           | powder                                   | 77 K                               | powder   | powder                         | 77 K                            | powder | 77 K              |      |                                  |                                     |
| <b>L1</b> | 524 $sh$ , 566 $sh$ ,<br><b>596</b>      | 436, <b>465</b> , 497,<br>535 $sh$ | 2        | 1.03<br>(52%)<br>0.36<br>(48%) | 1.29                            | 0.87   | -                 | 0.22 | 11.2                             |                                     |
| <b>L2</b> | 497 $sh$ , 525 $sh$ ,<br><b>551</b>      | 442, <b>468</b> , 501,<br>536 $sh$ | 24       | 1.68<br>(52%)<br>0.70<br>(48%) | 1.32                            | 1.42   | -                 | 1.69 | 5.36                             |                                     |
| <b>L3</b> | 500 $sh$ , 529 $sh$ ,<br><b>555</b>      | 441, 472, <b>511</b> ,<br>556 $sh$ | 41       | 2.66<br>(35%)<br>1.29<br>(65%) | 1.59                            | 2.01   | -                 | 2.03 | 2.92                             |                                     |
| <b>L4</b> | 510 $sh$ , <b>552</b> , 594,<br>644 $sh$ | 363, <b>382</b> , 404              | 13       | 2.46<br>(55%)<br>0.82<br>(45%) | 0.994<br>(64%)<br>2.33<br>(26%) | 2.11   | 1.68              | 0.61 | 4.12                             |                                     |

*sh* denotes a shoulder.

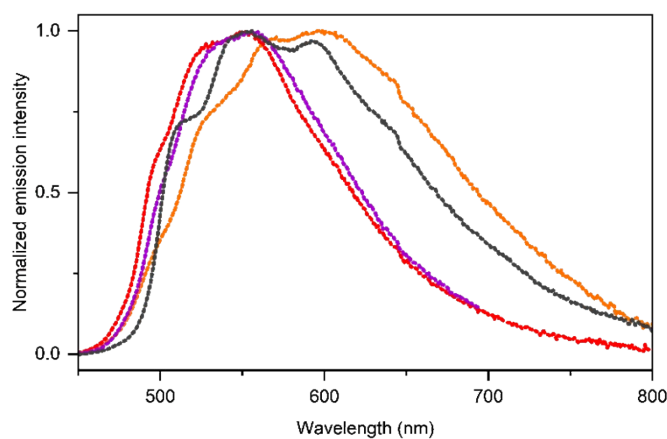

**Figure S23.** Emission spectra of ligands **L1** (orange), **L2** (red), **L3** (violet), and **L4** (grey) in the solid state as neat powders at room temperature upon excitation at  $\lambda_{\text{exc}} = 420$  nm.

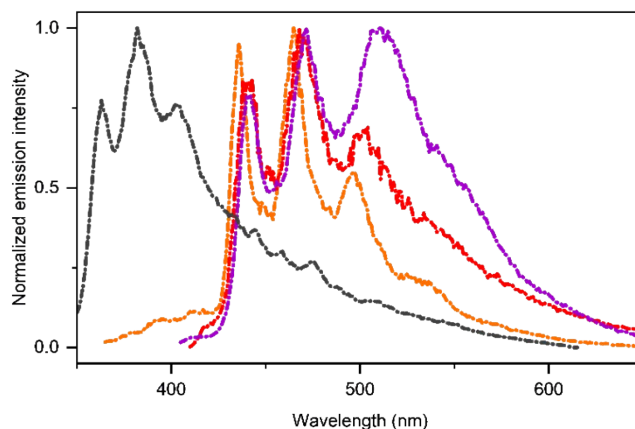

**Figure S24.** Emission spectra of ligands **L1** (orange), **L2** (red), **L3** (violet), and **L4** (grey) in  $\text{CH}_2\text{Cl}_2$  glassy matrix at 77K upon excitation at  $\lambda_{\text{exc}} = 320\text{--}380$  nm.

### Electrochemical characterization

The electrochemical properties of the complexes were assessed by means of cyclic voltammetry (CV). The CV experiments were carried out using a three-electrode electrochemical cell in anhydrous and degassed dichloromethane (DCM)/0.1M TBAPF<sub>6</sub> solution under an Ar atmosphere, using a 1 mM concentration for the copper complexes. Tetra-n-butylammonium hexafluorophosphate (TBAPF<sub>6</sub>, Sigma-Aldrich, 99%) was used as the supporting electrolyte and employed as received. The working electrode was a glassy-carbon (GC) disk electrode (2 mm diameter, PAR-Ametek). The electrode was polished as already described elsewhere.<sup>9</sup> Before experiments, the electrode was further polished with a 0.05 mm polycrystalline diamond suspension (Buehler, MetaDi) and electrochemically activated in the background solution by means of several voltammetric cycles at 0.5 Vs<sup>-1</sup> between the anodic and the cathodic solvent/electrolyte discharges, until the expected quality features were attained.<sup>10</sup> A platinum wire served as the counter electrode, while a silver wire, separated by the catolyte solution by a vycor frit, was used as a quasi-reference electrode. At the end of each experiment, the potential of the reference electrode was calibrated against the ferricenium/ferrocene ( $\text{Fc}^+|\text{Fc}^0$ ) couple, used as the internal redox standard. The solvent level was frequently checked and rinsed when necessary to avoid any change in the analyte concentration. An SP300 (Biologic) was used as the workstation for the CV experiments. A feedback compensation was applied to overcome the ohmic drop of the potential at the interface

electrode/solution. The effect of the scan rate was investigated over the range 50–500 mV s<sup>-1</sup>, and the peak current was found to depend linearly on the square root of scan rate for all compound, thus witnessing that the heterogeneous electron transfer process is diffusion-controlled. It is also worth noting that the peak-to-peak separation for all compound is in the range 60-70 mV, which is slightly larger than 59 mV expected for an ideal Nernstian behavior<sup>11</sup>, thus indicating a slightly slower kinetic for the heterogeneous electron transfer when compared to Fc<sup>+</sup>|Fc<sup>0</sup> redox couple.

### Computational data

All calculation were made using the AMS-2024 code<sup>12,13</sup> at the density functional theory with B3LYP functional (DFT).<sup>14</sup> All atoms were described with the DZP basis-set.<sup>15</sup> Scalar relativistic were introduced through the zero-order relativistic approximation (ZORA) Hamiltonian.<sup>16</sup> All calculations were made with a non-explicit dichloromethane solvent within the Conductor-like-screening model (COSMO).<sup>17</sup> Weak interactions were introduced through Grimme D3 corrections.<sup>18</sup> The structures of all complexes were fully optimized and the absorption spectra computed through time dependent DFT (TD-DFT) using the Tamm-Dancoff approximation (TDA).<sup>19</sup> Spin-orbit coupling corrections were introduced by perturbation of the computed spectra. Emission properties were determined after the optimization of excited states geometries through the TD-DFT approach, in the same conditions. The nature of the excited states has been analyzed with TheoDORE software.<sup>20</sup> The electron density differences were computed using the dgrid package and visualized using ChimeraX software.<sup>21</sup>

Non-Covalent Interaction (NCI) analyses have been performed by computing the wavefunction of the complexes with GAUSSIAN 16 (version C01)<sup>22</sup> at DFT level of Theory (B3LYP functional)<sup>23</sup> with the inclusion of Grimme's (GD3) dispersion corrections.<sup>18</sup> All atoms were described by Pople's 6-31+G\*\* basis set.<sup>24</sup> The solvent (CH<sub>2</sub>Cl<sub>2</sub>) was introduced through a PCM.<sup>25</sup> The NCI analysis was then done on the results wavefunction using the NCIPLOT package.<sup>26</sup>

**Table S7.** Compared theoretical and experimental structures. Distances are given in [Å]. N<sub>az</sub> = nitrogen of the thiazolo[4,5-*d*]thiazole moiety, N<sub>py</sub> = nitrogen of the peripheral moiety. Cu(1), Cu(2), P(1), and P(2) follow the atom numbering depicted in Figure 1 of the main text.

|  | Cu1 | Cu2 | Cu3 | Cu4 |
|--|-----|-----|-----|-----|
|--|-----|-----|-----|-----|

|                       | Exp   | Theo  | Exp   | Theo  | Exp   | Theo  | Exp   | Theo  |
|-----------------------|-------|-------|-------|-------|-------|-------|-------|-------|
| Cu(1)-N <sub>az</sub> | 2.014 | 2.040 | 2.018 | 2.053 | 2.050 | 2.063 | 2.100 | 2.069 |
| Cu(1)-N <sub>py</sub> | 2.136 | 2.265 | 2.195 | 2.203 | 2.131 | 2.159 | 2.120 | 2.131 |
| Cu(1)-P(1)            | 2.220 | 2.256 | 2.217 | 2.227 | 2.214 | 2.207 | 2.212 | 2.211 |
| Cu(1)-P(2)            | 2.239 | 2.217 | 2.252 | 2.260 | 2.279 | 2.278 | 2.262 | 2.272 |
| Cu(2)-N <sub>az</sub> | 2.014 | 2.038 | 2.018 | 2.037 | 2.050 | 2.063 | 2.100 | 2.069 |
| Cu(2)-N <sub>py</sub> | 2.136 | 2.367 | 2.195 | 2.311 | 2.126 | 2.159 | 2.120 | 2.131 |
| Cu(2)-P(1)            | 2.220 | 2.220 | 2.217 | 2.221 | 2.211 | 2.207 | 2.212 | 2.211 |
| Cu(2)-P(2)            | 2.239 | 2.260 | 2.252 | 2.076 | 2.267 | 2.278 | 2.262 | 2.272 |

**Table S8.** Absorption energies, absorption wavelength and oscillator strength of the first 20 computed singlet transitions for pro-ligands **L1-4**. Energies and wavelengths are given in [eV] and [nm], respectively.

|                 | <b>L1</b>        |                  |                  | <b>L2</b>        |                  |                  | <b>L3</b>        |                  |                  | <b>L4</b>        |                  |                  |
|-----------------|------------------|------------------|------------------|------------------|------------------|------------------|------------------|------------------|------------------|------------------|------------------|------------------|
|                 | E <sub>abs</sub> | λ <sub>abs</sub> | f <sub>osc</sub> | E <sub>abs</sub> | λ <sub>abs</sub> | f <sub>osc</sub> | E <sub>abs</sub> | λ <sub>abs</sub> | f <sub>osc</sub> | E <sub>abs</sub> | λ <sub>abs</sub> | f <sub>osc</sub> |
| S <sub>1</sub>  | 2.947            | 421              | 2.22E+00         | 2.929            | 423              | 2.17E+00         | 2.961            | 419              | 2.24E+00         | 2.820            | 440              | 2.13E+00         |
| S <sub>2</sub>  | 3.716            | 334              | 4.02E-02         | 3.648            | 340              | 9.30E-06         | 3.674            | 337              | 1.22E-02         | 3.482            | 356              | 7.13E-02         |
| S <sub>3</sub>  | 3.719            | 333              | 5.96E-08         | 3.650            | 340              | 6.96E-02         | 3.684            | 337              | 5.41E-02         | 3.492            | 355              | 3.79E-08         |
| S <sub>4</sub>  | 3.816            | 325              | 2.68E-07         | 3.812            | 325              | 9.06E-08         | 3.820            | 325              | 1.09E-04         | 3.766            | 329              | 4.10E-07         |
| S <sub>5</sub>  | 4.059            | 305              | 2.76E-07         | 4.040            | 307              | 8.70E-07         | 4.089            | 303              | 1.40E-03         | 3.884            | 319              | 1.64E-06         |
| S <sub>6</sub>  | 4.276            | 290              | 1.97E-01         | 4.247            | 292              | 2.18E-01         | 4.120            | 301              | 1.40E-01         | 4.032            | 307              | 2.29E-01         |
| S <sub>7</sub>  | 4.659            | 266              | 1.96E-06         | 4.483            | 277              | 2.11E-07         | 4.314            | 287              | 1.19E-04         | 4.406            | 281              | 3.77E-07         |
| S <sub>8</sub>  | 4.756            | 261              | 1.40E-01         | 4.726            | 262              | 1.35E-01         | 4.331            | 286              | 7.67E-03         | 4.478            | 277              | 3.08E-08         |
| S <sub>9</sub>  | 4.801            | 258              | 1.83E-07         | 4.730            | 262              | 5.39E-05         | 4.388            | 283              | 1.35E-04         | 4.488            | 276              | 1.03E-01         |
| S <sub>10</sub> | 4.814            | 258              | 3.40E-02         | 4.760            | 260              | 6.52E-02         | 4.393            | 282              | 1.63E-05         | 4.499            | 276              | 2.90E-06         |
| S <sub>11</sub> | 4.895            | 253              | 1.61E-03         | 4.816            | 257              | 4.23E-07         | 4.432            | 280              | 2.21E-04         | 4.520            | 274              | 5.96E-04         |
| S <sub>12</sub> | 4.896            | 253              | 1.50E-01         | 4.849            | 256              | 2.29E-03         | 4.443            | 279              | 2.62E-03         | 4.588            | 270              | 1.85E-02         |
| S <sub>13</sub> | 4.922            | 252              | 2.74E-03         | 4.890            | 254              | 1.38E-01         | 4.593            | 270              | 3.40E-02         | 4.817            | 257              | 1.29E-01         |
| S <sub>14</sub> | 5.014            | 247              | 3.81E-07         | 5.002            | 248              | 5.27E-07         | 4.661            | 266              | 4.43E-02         | 5.029            | 247              | 3.80E-08         |
| S <sub>15</sub> | 5.176            | 240              | 4.81E-02         | 5.118            | 242              | 5.51E-02         | 4.694            | 264              | 5.90E-04         | 5.036            | 246              | 1.55E-01         |
| S <sub>16</sub> | 5.297            | 234              | 1.96E-08         | 5.235            | 237              | 8.55E-04         | 4.732            | 262              | 7.56E-02         | 5.054            | 245              | 1.46E-08         |
| S <sub>17</sub> | 5.362            | 231              | 1.46E-08         | 5.258            | 236              | 3.95E-07         | 4.780            | 259              | 6.14E-02         | 5.076            | 244              | 4.88E-06         |
| S <sub>18</sub> | 5.378            | 231              | 1.64E-05         | 5.339            | 232              | 2.67E-08         | 4.794            | 259              | 6.12E-02         | 5.130            | 242              | 1.81E-05         |
| S <sub>19</sub> | 5.547            | 224              | 4.76E-05         | 5.456            | 227              | 3.50E-04         | 4.904            | 253              | 2.31E-02         | 5.247            | 236              | 4.17E-08         |
| S <sub>20</sub> | 5.583            | 222              | 3.62E-08         | 5.465            | 227              | 1.37E-07         | 4.911            | 252              | 1.13E-01         | 5.247            | 236              | 5.19E-03         |

**Table S9.** Comparison between the computed energies of the frontier orbitals of isolated ligand **L1** to **L4** and **Cu1** to **Cu4**. In red are the LUMO and in green the HOMO of the ligand and their equivalent TzTz orbitals in the complex. Values of the HOMO-LUMO gap ( $\Delta_{H-L}$ ) and, for the complexes, gap ( $\Delta_{L-L}$ ) between the LUMO and the highest HOMO purely localized on the TzTz ligand. Energies are given in [eV].

| orbital        | L1     | Cu1    | L2     | Cu2    | L3     | Cu3    | L4     | Cu4    |
|----------------|--------|--------|--------|--------|--------|--------|--------|--------|
| HOMO-4         |        |        |        |        |        |        |        | -7.174 |
| HOMO-3         |        |        |        |        |        |        |        | -7.160 |
| HOMO-2         |        | -7.044 |        | -6.999 |        | -6.940 |        | -7.091 |
| HOMO-1         |        | -6.642 |        | -6.543 |        | -6.518 |        | -6.715 |
| HOMO           | -6.099 | -6.599 | -6.008 | -6.438 | -6.050 | -6.422 | -6.230 | -6.673 |
| LUMO           | -2.714 | -3.855 | -2.641 | -3.755 | -2.692 | -3.722 | -2.972 | -4.054 |
| $\Delta_{H-L}$ | 3.385  | 2.744  | 3.367  | 2.683  | 3.358  | 2.700  | 3.258  | 2.619  |

**Table S10.** Absorption energies, absorption wavelength and oscillator strength of the first 50 computed singlet transitions for **Cu1-4**. Energies and wavelengths are given in [eV] and [nm], respectively.

|                | <b>Cu1</b>       |                  |                  | <b>Cu2</b>       |                  |                  | <b>Cu3</b>       |                  |                  | <b>Cu4</b>       |                  |                  |
|----------------|------------------|------------------|------------------|------------------|------------------|------------------|------------------|------------------|------------------|------------------|------------------|------------------|
|                | E <sub>abs</sub> | λ <sub>abs</sub> | f <sub>osc</sub> | E <sub>abs</sub> | λ <sub>abs</sub> | f <sub>osc</sub> | E <sub>abs</sub> | λ <sub>abs</sub> | f <sub>osc</sub> | E <sub>abs</sub> | λ <sub>abs</sub> | f <sub>osc</sub> |
| S <sub>1</sub> | 2.209            | 561              | 2.29E-01         | 2.161            | 574              | 1.22E-01         | 2.174            | 570              | 1.26E-01         | 2.100            | 590              | 2.13E-01         |
| S <sub>2</sub> | 2.277            | 545              | 1.00E-03         | 2.266            | 547              | 5.35E-02         | 2.267            | 547              | 5.90E-02         | 2.164            | 573              | 1.70E-03         |

|                 |       |     |          |  |       |     |          |  |       |     |          |  |       |     |          |
|-----------------|-------|-----|----------|--|-------|-----|----------|--|-------|-----|----------|--|-------|-----|----------|
| S <sub>3</sub>  | 2.530 | 490 | 2.13E-03 |  | 2.739 | 453 | 9.06E-02 |  | 2.743 | 452 | 2.66E-03 |  | 2.372 | 523 | 2.60E-03 |
| S <sub>4</sub>  | 2.625 | 472 | 7.10E-03 |  | 2.800 | 443 | 6.60E-02 |  | 2.800 | 443 | 1.16E+00 |  | 2.469 | 502 | 9.17E-03 |
| S <sub>5</sub>  | 2.778 | 446 | 8.01E-01 |  | 2.827 | 439 | 8.51E-01 |  | 2.853 | 435 | 5.40E-01 |  | 2.647 | 468 | 1.12E-01 |
| S <sub>6</sub>  | 2.825 | 439 | 9.21E-01 |  | 2.884 | 430 | 6.41E-01 |  | 2.931 | 423 | 5.05E-03 |  | 2.699 | 459 | 8.52E-04 |
| S <sub>7</sub>  | 2.850 | 435 | 6.90E-04 |  | 3.017 | 411 | 7.33E-02 |  | 3.000 | 413 | 5.45E-02 |  | 2.737 | 453 | 1.60E+00 |
| S <sub>8</sub>  | 3.168 | 391 | 6.36E-04 |  | 3.094 | 401 | 1.39E-03 |  | 3.157 | 393 | 1.22E-02 |  | 2.993 | 414 | 6.80E-04 |
| S <sub>9</sub>  | 3.175 | 390 | 1.15E-02 |  | 3.143 | 394 | 4.83E-03 |  | 3.242 | 382 | 2.40E-02 |  | 2.999 | 413 | 1.24E-02 |
| S <sub>10</sub> | 3.276 | 378 | 9.42E-04 |  | 3.230 | 384 | 4.41E-02 |  | 3.257 | 381 | 3.41E-02 |  | 3.082 | 402 | 1.49E-03 |
| S <sub>11</sub> | 3.324 | 373 | 4.36E-02 |  | 3.281 | 378 | 1.49E-02 |  | 3.294 | 376 | 2.45E-02 |  | 3.113 | 398 | 1.05E-02 |
| S <sub>12</sub> | 3.333 | 372 | 1.30E-01 |  | 3.345 | 371 | 6.57E-02 |  | 3.310 | 375 | 8.69E-04 |  | 3.128 | 396 | 4.14E-05 |
| S <sub>13</sub> | 3.334 | 372 | 7.12E-06 |  | 3.375 | 367 | 5.57E-02 |  | 3.363 | 369 | 8.13E-02 |  | 3.131 | 396 | 2.07E-01 |
| S <sub>14</sub> | 3.425 | 362 | 9.64E-04 |  | 3.532 | 351 | 4.55E-02 |  | 3.557 | 349 | 2.44E-03 |  | 3.303 | 375 | 6.40E-04 |
| S <sub>15</sub> | 3.490 | 355 | 8.50E-03 |  | 3.550 | 349 | 2.57E-03 |  | 3.589 | 345 | 1.52E-02 |  | 3.318 | 374 | 1.20E-03 |
| S <sub>16</sub> | 3.504 | 354 | 6.14E-04 |  | 3.571 | 347 | 5.74E-03 |  | 3.602 | 344 | 7.91E-02 |  | 3.320 | 373 | 4.53E-04 |
| S <sub>17</sub> | 3.524 | 352 | 1.51E-02 |  | 3.583 | 346 | 5.17E-04 |  | 3.630 | 342 | 7.57E-03 |  | 3.322 | 373 | 2.67E-02 |
| S <sub>18</sub> | 3.539 | 350 | 2.98E-03 |  | 3.609 | 344 | 4.33E-03 |  | 3.643 | 340 | 2.25E-03 |  | 3.358 | 369 | 2.59E-02 |
| S <sub>19</sub> | 3.544 | 350 | 2.52E-02 |  | 3.623 | 342 | 2.40E-03 |  | 3.652 | 340 | 1.19E-02 |  | 3.358 | 369 | 2.10E-03 |
| S <sub>20</sub> | 3.598 | 345 | 1.05E-04 |  | 3.632 | 341 | 2.50E-03 |  | 3.683 | 337 | 2.07E-02 |  | 3.404 | 364 | 1.08E-03 |
| S <sub>21</sub> | 3.611 | 343 | 7.86E-03 |  | 3.663 | 338 | 7.25E-03 |  | 3.689 | 336 | 2.05E-02 |  | 3.437 | 361 | 2.46E-03 |
| S <sub>22</sub> | 3.617 | 343 | 8.25E-04 |  | 3.686 | 336 | 9.33E-03 |  | 3.707 | 334 | 6.02E-03 |  | 3.443 | 360 | 5.10E-03 |
| S <sub>23</sub> | 3.623 | 342 | 4.05E-03 |  | 3.703 | 335 | 3.25E-02 |  | 3.731 | 332 | 7.04E-03 |  | 3.453 | 359 | 2.66E-03 |
| S <sub>24</sub> | 3.626 | 342 | 5.84E-04 |  | 3.731 | 332 | 1.34E-02 |  | 3.736 | 332 | 2.03E-03 |  | 3.461 | 358 | 6.20E-06 |
| S <sub>25</sub> | 3.649 | 340 | 5.27E-04 |  | 3.733 | 332 | 1.25E-02 |  | 3.744 | 331 | 2.72E-02 |  | 3.469 | 357 | 4.61E-03 |
| S <sub>26</sub> | 3.652 | 340 | 4.15E-02 |  | 3.738 | 332 | 1.48E-02 |  | 3.750 | 331 | 6.42E-03 |  | 3.487 | 356 | 7.69E-04 |
| S <sub>27</sub> | 3.669 | 338 | 7.14E-03 |  | 3.744 | 331 | 1.20E-03 |  | 3.762 | 330 | 1.19E-02 |  | 3.493 | 355 | 1.16E-02 |
| S <sub>28</sub> | 3.690 | 336 | 3.79E-05 |  | 3.766 | 329 | 4.86E-03 |  | 3.772 | 329 | 1.04E-02 |  | 3.512 | 353 | 1.01E-02 |
| S <sub>29</sub> | 3.692 | 336 | 1.77E-02 |  | 3.776 | 328 | 2.33E-03 |  | 3.799 | 326 | 6.11E-03 |  | 3.523 | 352 | 3.51E-02 |
| S <sub>30</sub> | 3.716 | 334 | 5.00E-04 |  | 3.787 | 327 | 7.72E-03 |  | 3.808 | 326 | 1.29E-02 |  | 3.529 | 351 | 2.01E-06 |
| S <sub>31</sub> | 3.733 | 332 | 4.04E-04 |  | 3.830 | 324 | 2.43E-03 |  | 3.822 | 324 | 2.99E-03 |  | 3.555 | 349 | 5.52E-03 |
| S <sub>32</sub> | 3.733 | 332 | 1.94E-02 |  | 3.835 | 323 | 2.32E-03 |  | 3.838 | 323 | 7.51E-03 |  | 3.565 | 348 | 1.64E-05 |
| S <sub>33</sub> | 3.755 | 330 | 2.02E-03 |  | 3.846 | 322 | 9.71E-03 |  | 3.845 | 322 | 3.74E-02 |  | 3.567 | 348 | 2.98E-02 |
| S <sub>34</sub> | 3.774 | 329 | 9.22E-03 |  | 3.871 | 320 | 8.60E-02 |  | 3.851 | 322 | 2.89E-03 |  | 3.632 | 341 | 4.30E-03 |
| S <sub>35</sub> | 3.779 | 328 | 4.11E-03 |  | 3.883 | 319 | 2.73E-03 |  | 3.859 | 321 | 4.42E-03 |  | 3.633 | 341 | 2.64E-03 |
| S <sub>36</sub> | 3.782 | 328 | 1.04E-02 |  | 3.884 | 319 | 2.76E-03 |  | 3.871 | 320 | 1.18E-02 |  | 3.658 | 339 | 2.19E-03 |
| S <sub>37</sub> | 3.809 | 325 | 5.42E-03 |  | 3.901 | 318 | 2.48E-02 |  | 3.885 | 319 | 5.47E-02 |  | 3.694 | 336 | 5.23E-03 |
| S <sub>38</sub> | 3.832 | 324 | 1.82E-03 |  | 3.914 | 317 | 1.98E-02 |  | 3.891 | 319 | 3.66E-02 |  | 3.728 | 333 | 3.37E-03 |
| S <sub>39</sub> | 3.890 | 319 | 5.73E-03 |  | 3.930 | 315 | 4.93E-04 |  | 3.908 | 317 | 1.95E-02 |  | 3.772 | 329 | 7.71E-04 |
| S <sub>40</sub> | 3.913 | 317 | 1.85E-03 |  | 3.962 | 313 | 7.65E-02 |  | 3.940 | 315 | 7.50E-02 |  | 3.774 | 328 | 1.03E-03 |
| S <sub>41</sub> | 3.951 | 314 | 4.29E-03 |  | 3.974 | 312 | 1.83E-03 |  | 3.967 | 313 | 2.32E-03 |  | 3.782 | 328 | 1.59E-03 |
| S <sub>42</sub> | 3.952 | 314 | 6.96E-04 |  | 3.981 | 311 | 8.17E-03 |  | 3.970 | 312 | 4.41E-03 |  | 3.790 | 327 | 6.63E-04 |
| S <sub>43</sub> | 3.960 | 313 | 2.91E-05 |  | 4.004 | 310 | 2.61E-02 |  | 3.986 | 311 | 8.51E-03 |  | 3.843 | 323 | 8.98E-04 |
| S <sub>44</sub> | 3.984 | 311 | 4.07E-04 |  | 4.009 | 309 | 6.21E-02 |  | 3.987 | 311 | 1.41E-02 |  | 3.845 | 322 | 4.96E-03 |
| S <sub>45</sub> | 4.000 | 310 | 5.13E-04 |  | 4.024 | 308 | 1.00E-01 |  | 4.003 | 310 | 9.32E-03 |  | 3.849 | 322 | 1.93E-02 |
| S <sub>46</sub> | 4.048 | 306 | 3.76E-03 |  | 4.039 | 307 | 4.17E-03 |  | 4.005 | 310 | 6.96E-02 |  | 3.972 | 312 | 2.98E-03 |
| S <sub>47</sub> | 4.050 | 306 | 2.37E-01 |  | 4.050 | 306 | 5.78E-02 |  | 4.022 | 308 | 6.36E-02 |  | 4.000 | 310 | 3.91E-03 |
| S <sub>48</sub> | 4.091 | 303 | 1.20E-02 |  | 4.053 | 306 | 1.88E-02 |  | 4.029 | 308 | 6.09E-03 |  | 4.003 | 310 | 8.40E-04 |
| S <sub>49</sub> | 4.096 | 303 | 5.60E-03 |  | 4.056 | 306 | 8.46E-03 |  | 4.049 | 306 | 1.33E-02 |  | 4.012 | 309 | 2.69E-04 |
| S <sub>50</sub> | 4.131 | 300 | 2.65E-02 |  | 4.107 | 302 | 3.26E-03 |  | 4.051 | 306 | 3.62E-03 |  | 4.078 | 304 | 1.39E-02 |

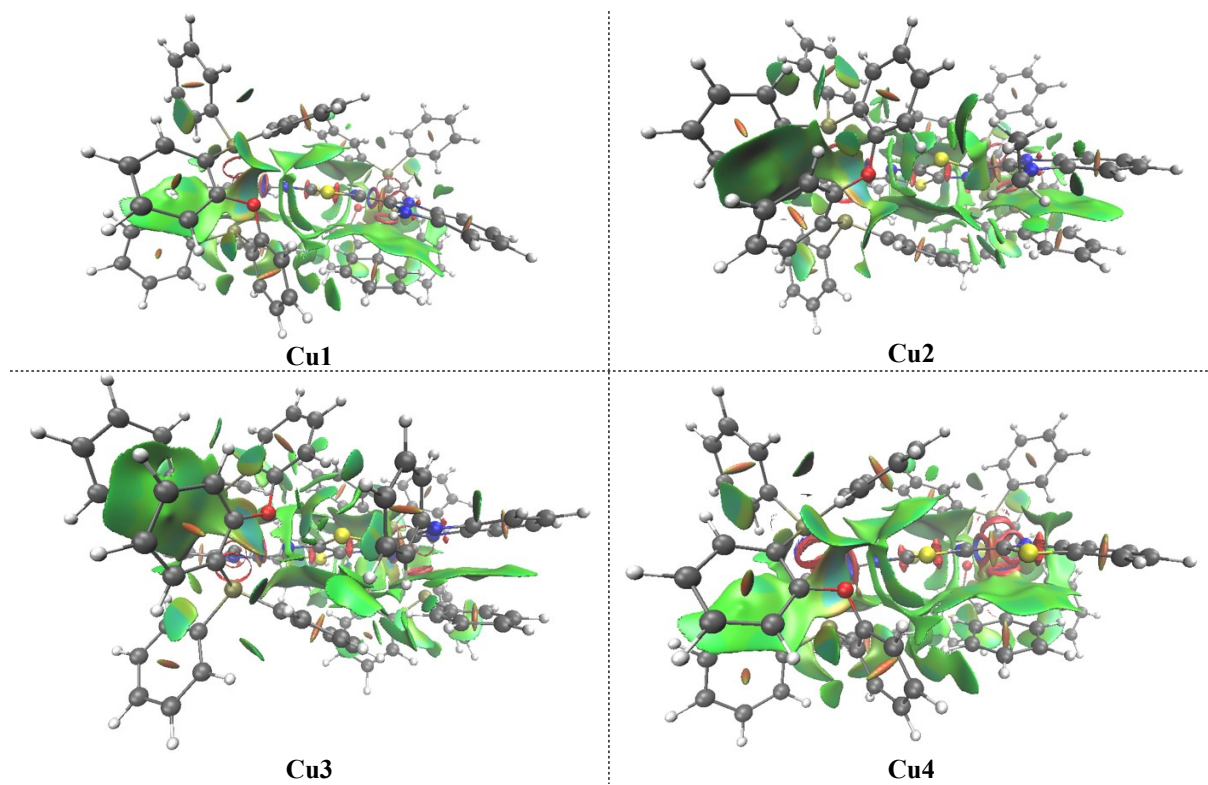

**Figure S25.** Non-Covalent Interaction (NCI) analysis of **Cu1**, **Cu2**, **Cu3** and **Cu4** complexes. Red areas correspond to repulsive steric interactions, green areas to attractive dispersion forces and blue areas to attractive electrostatic interactions.

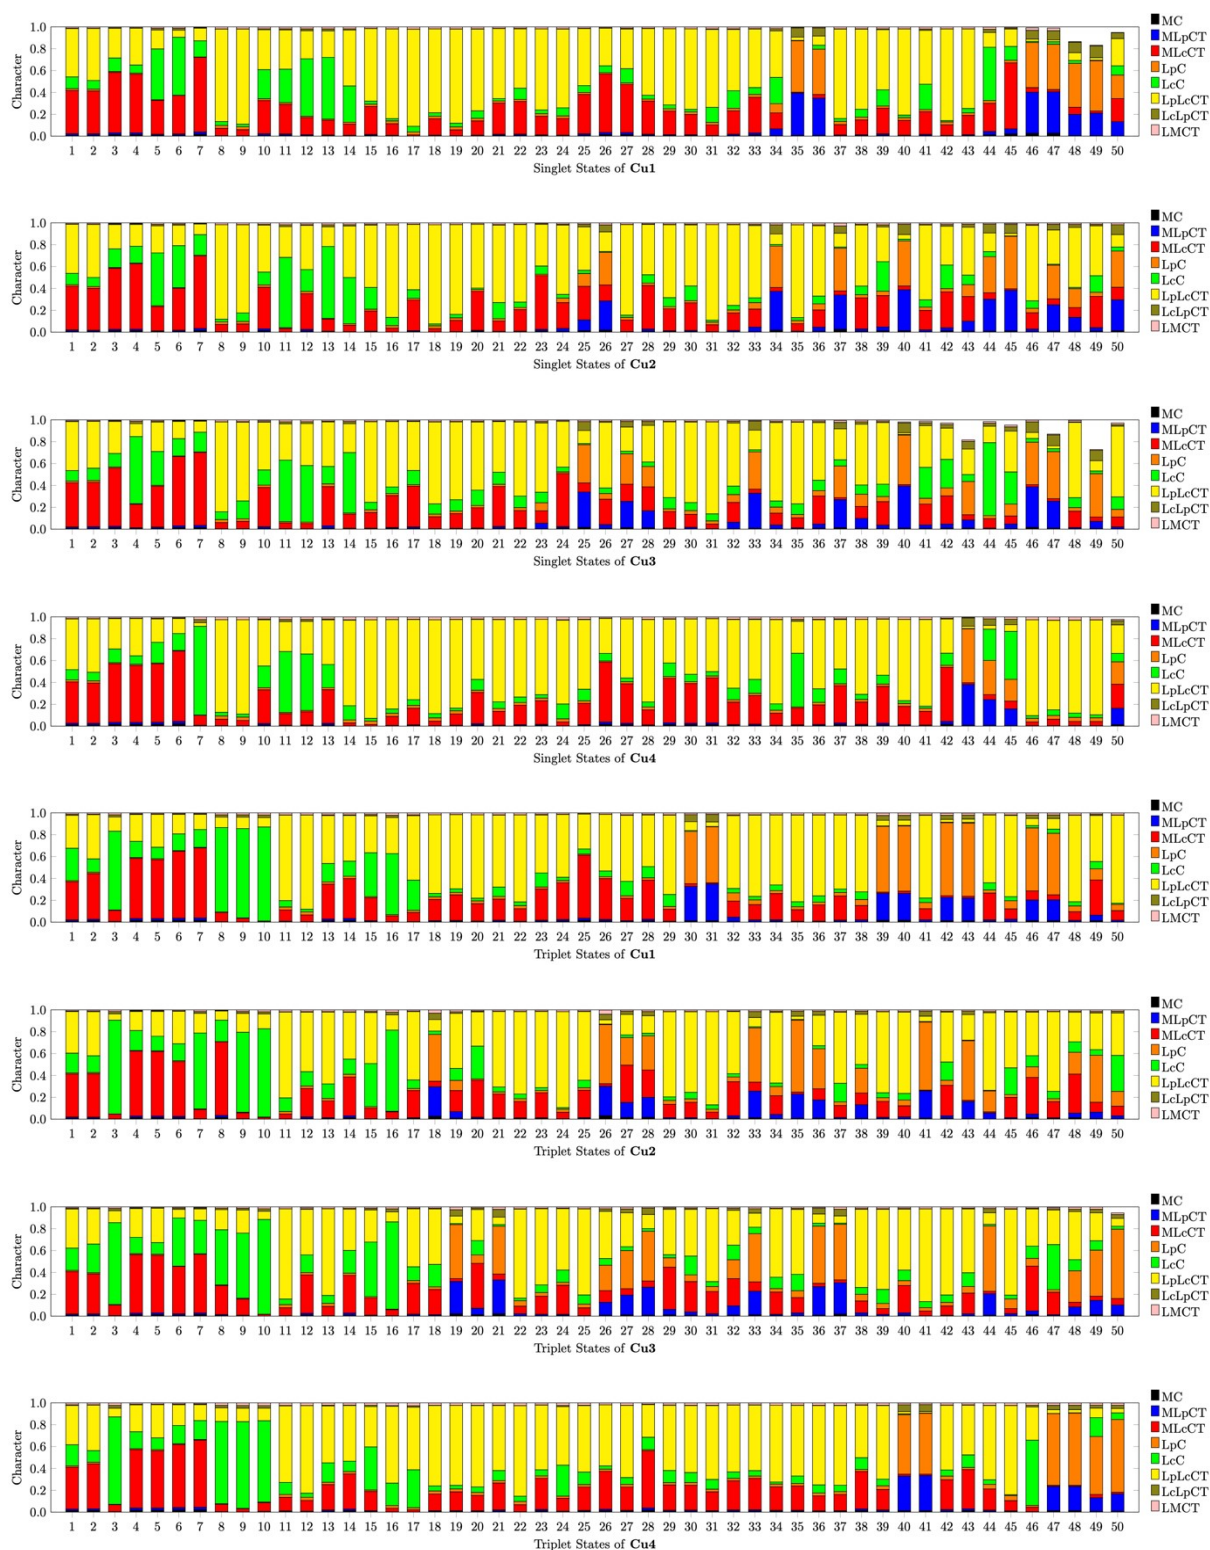

**Figure S26.** THEODore Analysis of the computed singlet (*top*) and triplet (*bottom*) states of the four complexes. L<sub>p</sub> stands for the diphosphine ligand and L<sub>c</sub> for the TzTz ligand.

## LEC fabrication

LECs were fabricated on indium tin oxide (ITO)-coated glass substrates that were sequentially cleaned and treated with ultraviolet/ozone. A 40 nm layer of poly(3,4-ethylenedioxythiophene):poly(styrene sulfonate) (PEDOT:PSS) was deposited by spin coating at 3500 rpm and subsequently annealed at 150 °C for 30 min in air. The emissive layer was formed by spin coating a dichloromethane solution containing the copper complex (**Cu1** or **Cu4**) blended with the ionic liquid 1-butyl-3-methylimidazolium hexafluorophosphate [BMIMPF<sub>6</sub>] (80:20 wt.%). The ionic liquid provided mobile ions to facilitate device operation. For **Cu4**-based devices, the emissive-layer thickness was controlled by varying the solution concentration from 50 to 70 mg mL<sup>-1</sup> while spin coating at 2000 rpm for 60 s. For **Cu1**, owing to its limited solubility, a fixed concentration of 30 mg mL<sup>-1</sup> was used and the film thickness was tuned by adjusting the spin-coating speed from 750 to 2000 rpm. Film thicknesses were measured by ellipsometry. After deposition, the devices were dried in a vacuum oven at 60 °C for 8 h to remove residual solvent. A silver top electrode was then thermally evaporated under a vacuum of  $\approx 10^{-6}$  torr. Electroluminescence (EL) characteristics were measured using a source-measure unit (B2901A, Keysight) and a calibrated silicon photodiode, while EL spectra were recorded with a calibrated fiber-optic spectrometer (USB2000, Ocean Optics). All measurements were performed under constant voltage bias in a nitrogen-filled glovebox.

## EL characteristics of LEC devices

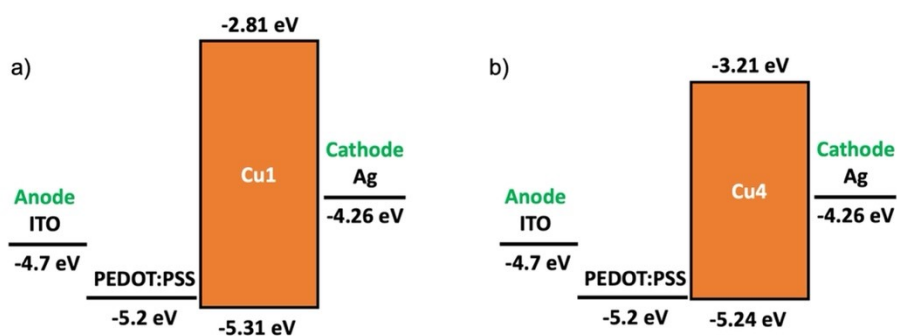

**Figure S27.** Energy level diagram of the materials employed for the fabrication of LEC devices comprising complex **Cu1** and **Cu4**.

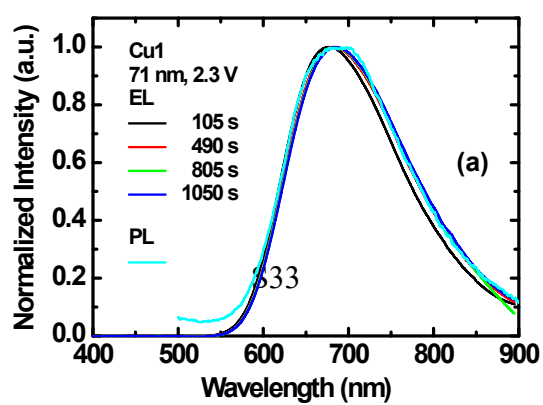

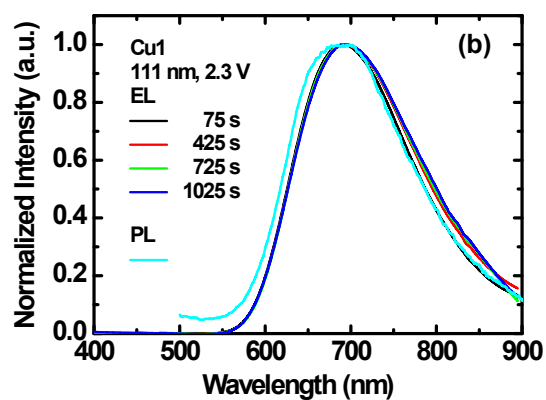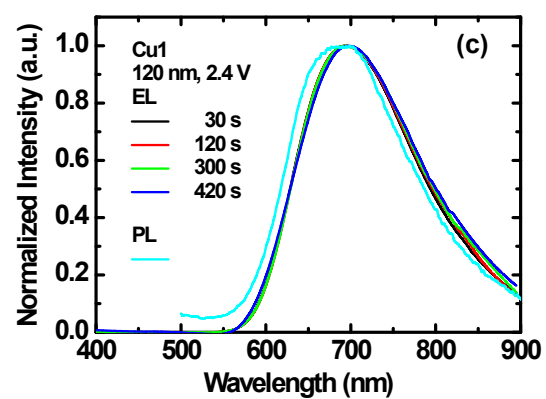

**Figure S28.** Time-dependent EL spectra of LECs based on complex **Cu1** with emissive layer thicknesses of (a) 71, (b) 111, and (c) 120 nm. The applied bias voltage is indicated in each panel. The PL spectrum of the emissive layer is shown for comparison.

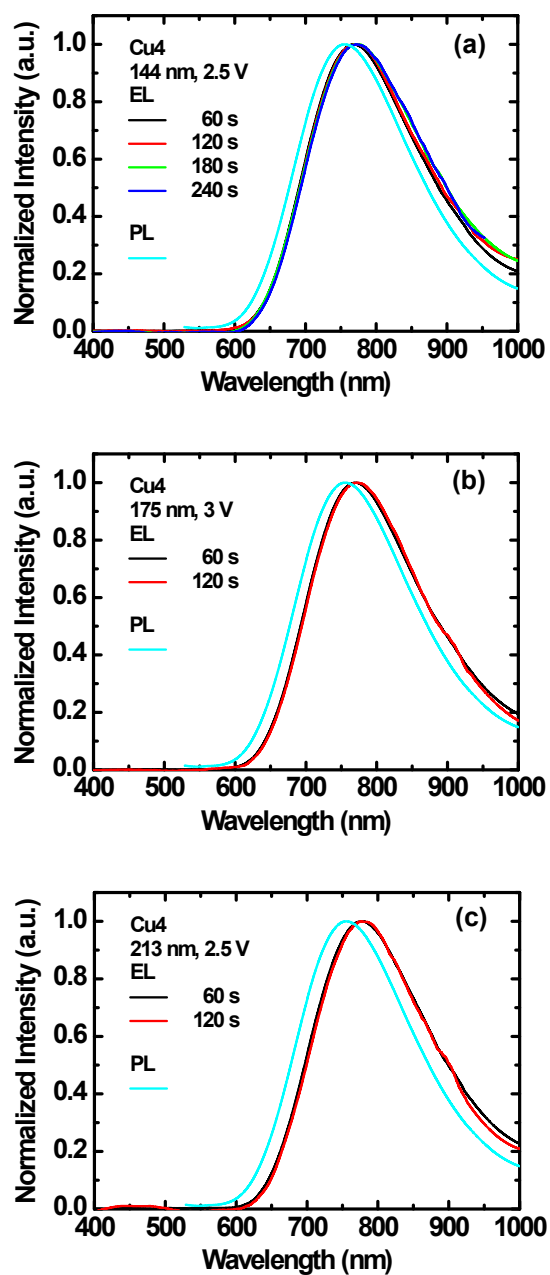

**Figure S29.** Time-dependent EL spectra of LECs based on complex **Cu4** with emissive layer thicknesses of (a) 144, (b) 175, and (c) 213 nm. The applied bias voltage is indicated in each panel. The PL spectrum of the emissive layer is shown for comparison.

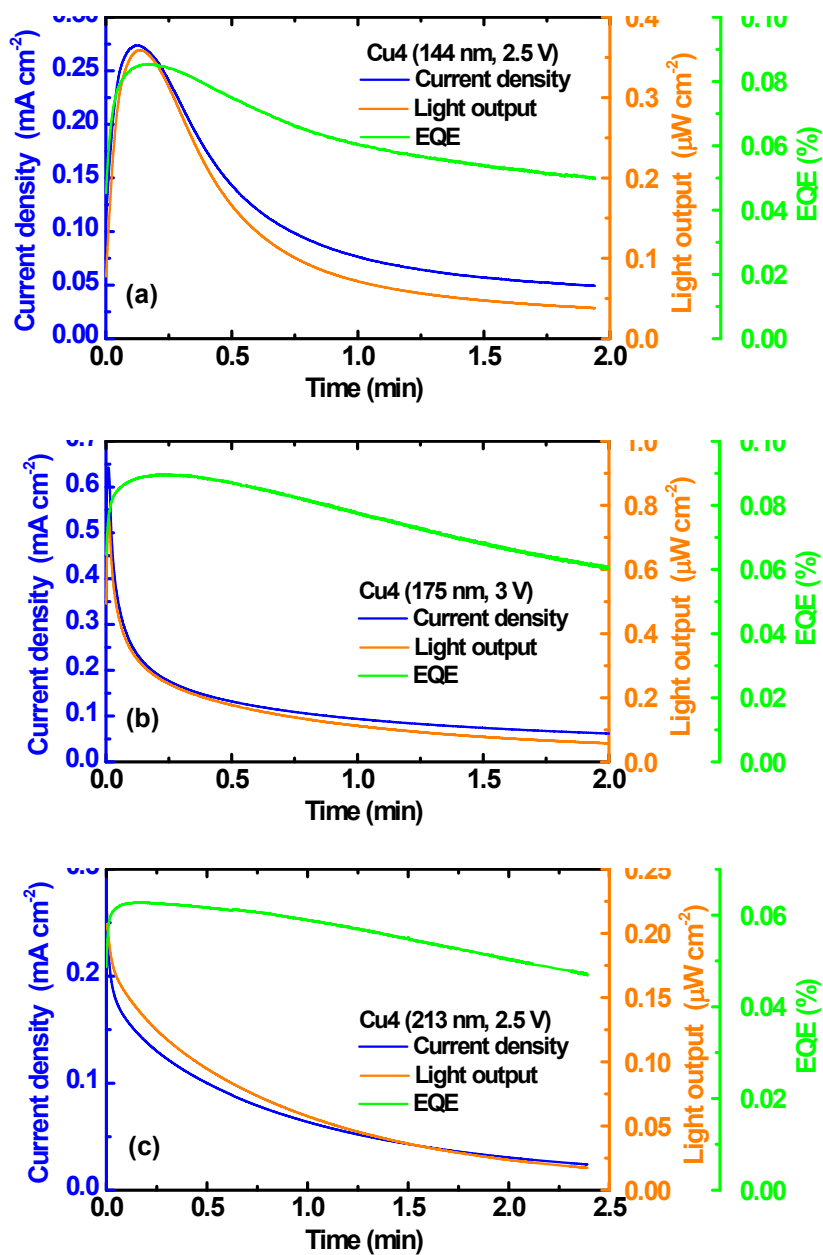

**Figure S30.** Time-dependent current density, light output, and EQE of LECs based on **Cu4** with emissive-layer thicknesses of (a) 144, (b) 175, and (c) 213 nm. The applied bias voltage is indicated in each panel.

## References

- 1 M. Patanapongpibul, C. Zhang, G. Chen, S. Guo, Q. Zhang, S. Zheng, G. Wang and Q.-H. Chen, *Bioorg. Med. Chem.*, 2018, **26**, 4751–4760.
- 2 Bruker Corporation, *M86-EXX278V1 APEX4 User Manual*, 2021.
- 3 G. M. Sheldrick, *Acta Cryst. A Found Adv*, 2015, **71**, 3–8.
- 4 G. M. Sheldrick, *Acta Cryst. C*, 2015, **71**, 3–8.
- 5 A. L. Spek, *J. Appl. Cryst.*, 2003, **36**, 7–13.
- 6 G. A. Crosby and J. N. Demas, *J. Am. Chem. Soc.*, 1970, **92**, 7262–7270.
- 7 H. Ishida, S. Tobita, Y. Hasegawa, R. Katoh and K. Nozaki, *Coord. Chem. Rev.*, 2010, **254**, 2449–2458.
- 8 J. R. Lakowicz, *Principles of fluorescence spectroscopy*, Springer, New York, NY, Third edition, corrected at 4. printing., 2010.
- 9 S. Antonello, M. Musumeci, D. D. M. Wayner and F. Maran, *J. Am. Chem. Soc.*, 1997, **119**, 9541–9549.
- 10 A. Belèn Meneses, S. Antonello, M. C. Arévalo and F. Maran, *Electroanalysis*, 2006, **18**, 363–370.
- 11 A. J. Bard, L. R. Faulkner and H. S. White, *Electrochemical methods: fundamentals and applications*, Wiley, Hoboken, NJ, USA Chichester, West Sussex, UK, Third edition., 2022.
- 12 E. J. Baerends, N. F. Aguirre, N. D. Austin, J. Autschbach, F. M. Bickelhaupt, R. Bulo, C. Cappelli, A. C. T. van Duin, F. Egidi, C. Fonseca Guerra, A. Förster, M. Franchini, T. P. M. Goumans, T. Heine, M. Hellström, C. R. Jacob, L. Jensen, M. Krykunov, E. van Lenthe, A. Michalak, M. M. Mitoraj, J. Neugebauer, V. P. Nicu, P. Philipsen, H. Ramanantoanina, R. Rüger, G. Schreckenbach, M. Stener, M. Swart, J. M. Thijssen, T. Trnka, L. Visscher, A. Yakovlev and S. van Gisbergen, *J. Chem. Phys.*, 2025, **162**, 162501.
- 13 Vrije Universiteit, Amsterdam, ADF Manual 2025.1, <http://www.scm.com>, (accessed September 26, 2025).
- 14 P. J. Stephens, F. J. Devlin, C. F. Chabalowski and M. J. Frisch, *J. Phys. Chem.*, 1994, **98**, 11623–11627.
- 15 E. Van Lenthe and E. J. Baerends, *J. Comput. Chem.*, 2003, **24**, 1142–1156.
- 16 E. van Lenthe, A. Ehlers and E.-J. Baerends, *J. Chem. Phys.*, 1999, **110**, 8943–8953.
- 17 A. Klamt and G. Schüürmann, *J. Chem. Soc., Perkin Trans. 2*, 1993, 799–805.
- 18 S. Grimme, J. Antony, S. Ehrlich and H. Krieg, *J. Chem. Phys.*, 2010, **132**, 154104.
- 19 S. Hirata and M. Head-Gordon, *Chem. Phys. Lett.*, 1999, **314**, 291–299.
- 20 F. Plasser, *J. Chem. Phys.*, 2020, **152**, 084108.
- 21 E. F. Pettersen, T. D. Goddard, C. C. Huang, G. S. Couch, D. M. Greenblatt, E. C. Meng and T. E. Ferrin, *J. Comput. Chem.*, 2004, **25**, 1605–1612.
- 22 M. J. Frisch, G. W. Trucks, H. B. Schlegel, G. E. Scuseria, M. A. Robb, J. R. Cheeseman, G. Scalmani, V. Barone, G. A. Petersson, H. Nakatsuji, X. Li, M. Caricato, A. V. Marenich, J. Bloino, B. G. Janesko, R. Gomperts, B. Mennucci, H. P. Hratchian, J. V. Ortiz, A. F. Izmaylov, J. L. Sonnenberg, D. Williams-Young, F. Ding, F. Lipparini, F. Egidi, J. Goings, B. Peng, A. Petrone, T. Henderson, D. Ranasinghe, V. G. Zakrzewski, J. Gao, N. Rega, G. Zheng, W. Liang, M. Hada, M. Ehara, K. Toyota, R. Fukuda, J. Hasegawa, M. Ishida, T. Nakajima, Y. Honda, O. Kitao, H. Nakai, T. Vreven, K. Throssell, J. A. Montgomery, Jr., J. E. Peralta, F. Ogliaro, M. J. Bearpark, J. J. Heyd, E. N. Brothers, K. N. Kudin, V. N. Staroverov, T. A. Keith, R. Kobayashi, J. Normand, K. Raghavachari, A. P. Rendell, J. C. Burant, S. S. Iyengar, J. Tomasi, M. Cossi, J. M.

- Millam, M. Klene, C. Adamo, R. Cammi, J. W. Ochterski, R. L. Martin, K. Morokuma, O. Farkas, J. B. Foresman, and D. J. Fox, *Gaussian 16*, Gaussian Inc., Wallingford CT, 2016.
- 23 A. D. Becke, *J. Chem. Phys.*, 1993, **98**, 5648–5652.
- 24 R. Ditchfield, W. J. Hehre and J. A. Pople, *J. Chem. Phys.*, 1971, **54**, 724–728.
- 25 S. Miertuš, E. Scrocco and J. Tomasi, *Chem. Phys.*, 1981, **55**, 117–129.
- 26 J. Contreras-García, E. R. Johnson, S. Keinan, R. Chaudret, J.-P. Piquemal, D. N. Beratan and W. Yang, *J. Chem. Theory Comput.*, 2011, **7**, 625–632.
